# Supplementary material for: Mechanistically distinct cancer-associated mTOR activation clusters predict sensitivity to rapamycin
Source: JCI journal article supplement (doi:10.1172/jci86120), 2016-08-01
Supplement: sd1 [file 1]

**SUPPLEMENTARY FIGURE and FIGURE LEGENDS**

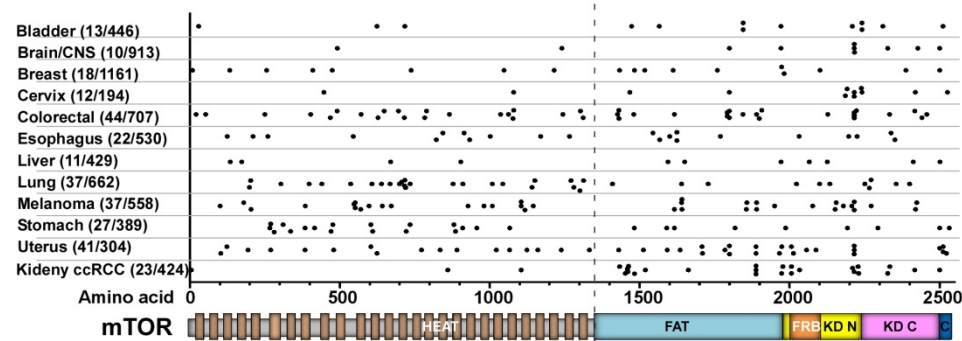

**Supplementary Figure 1**

**Supplementary Figure 1 mTOR missense mutations reported in human cancer.**  
Amino acid positions of mTOR missense mutations identified in different cancer types from TCGA studies were shown (adapted from cBioPortal). Numbers in the parenthesis indicate mTOR missense mutation versus total cases sequenced.

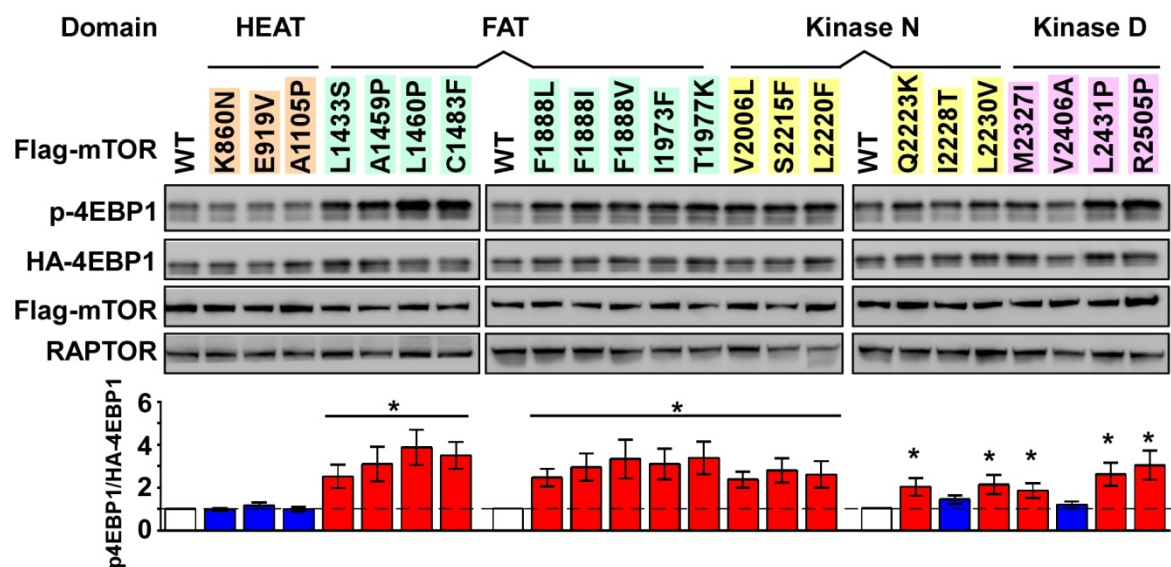

**Supplementary Figure 2**

**Supplementary Figure 2 Most of the mTOR mutations in the FAT and kinase domains induce higher levels of 4EBP1 phosphorylation (S65) than WT mTOR.** 293T cells were transfected with vectors expressing HA-tagged 4EBP1 and Flag-tagged WT or mutant mTOR. Whole cell lysates were subjected to immunoblot analysis using the indicated antibodies. Densitometry of phosphorylated 4EBP1 versus HA-4EBP1 from three independent experiments is shown (mean  $\pm$  SEM,  $n=3$  independent experiments). \*,  $P<0.05$  ( $t$ -test).

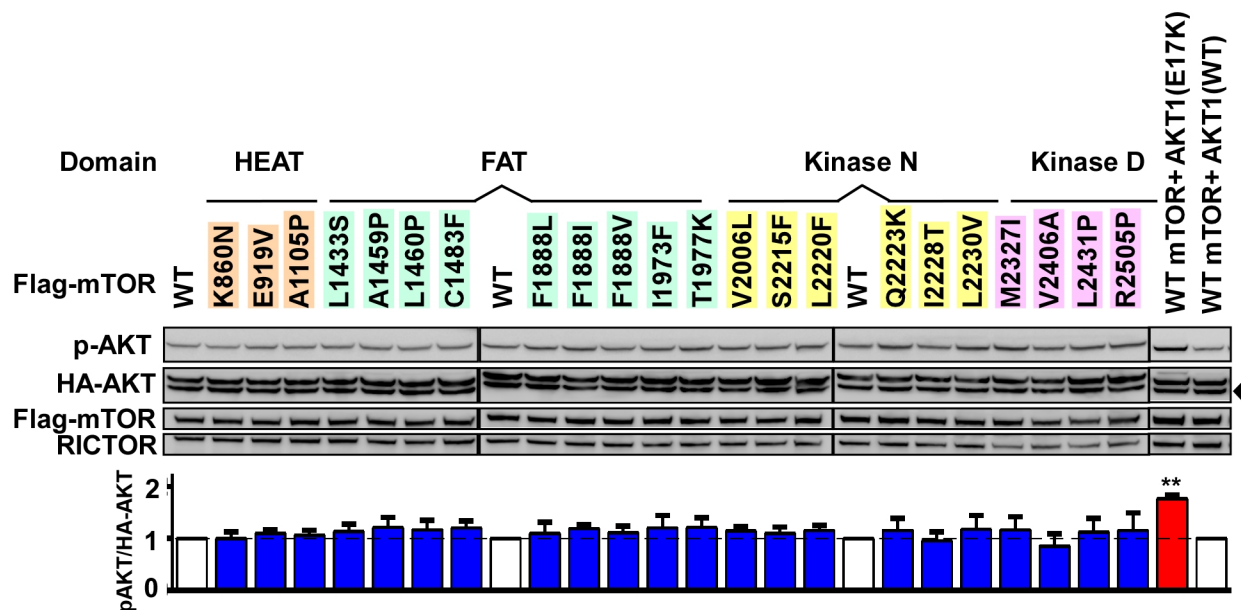

**Supplementary Figure 3**

**Supplementary Figure 3 Most of the mTOR mutations in ccRCC do not induce higher levels of AKT phosphorylation (S473) than WT mTOR.** 293T cells were transfected with vectors expressing HA-tagged AKT and Flag-tagged WT or mutant mTOR. For positive control, 293T cells were transfected with vectors expressing HA-tagged AKT1 or AKT1 activating mutation (E17K) and Flag-tagged WT. 36 hours later, cells were starved for serum overnight before harvest. Whole cell lysates were subjected to immunoblot analysis using the indicated antibodies. Densitometry of phosphorylated AKT (S473) versus HA-AKT from three independent experiments is shown (mean  $\pm$  SEM,  $n=3$  independent experiments). \*\*,  $P<0.05$  ( $t$ -test).

**A**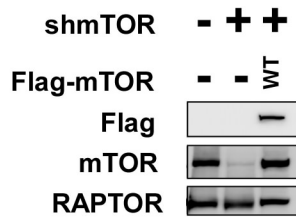**B**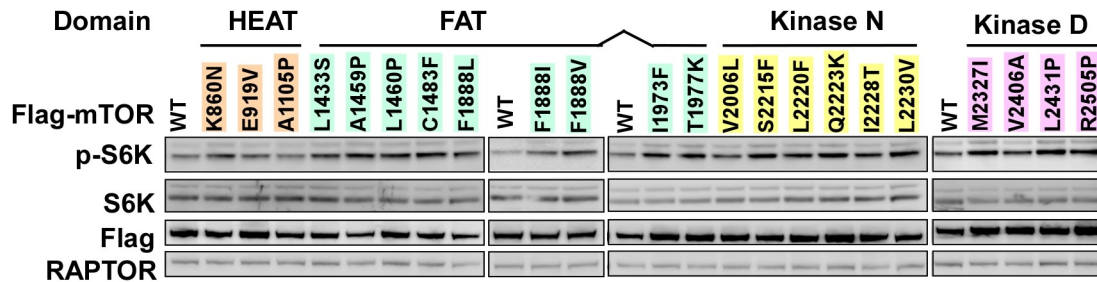**C**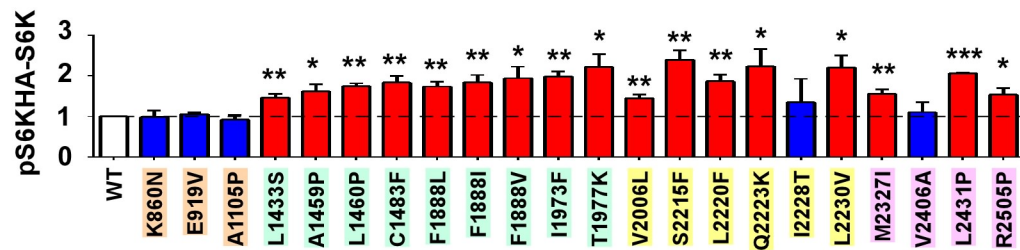**Supplementary Figure 4**

**Supplementary Figure 4 Most of the mTOR mutations in the FAT and kinase domains expressed at same level as endogenous protein induce higher levels of S6K phosphorylation (T389) than WT mTOR. (A)** Expression of Flag-mTOR in mTOR-silenced 293T cells. 293T cells, mTOR-silenced (targeting 3'UTR region) 293T cells expressing Flag-mTOR were subjected to immunoblot analysis using the indicated antibodies. Of note, Flag-mTOR was expressed at a similar level as endogenous mTOR. **(B)** mTOR-silenced 293T cells were transfected with vectors expressing Flag-tagged WT or mutant mTOR. 48 hours post transfection, cells were lysed and whole cell lysates were subjected to immunoblot analysis using the indicated antibodies. **(C)** Densitometry of phosphorylated S6K (T389) versus S6K from three independent experiments is shown (mean  $\pm$  SEM,  $n=3$  independent experiments). \*,  $P<0.1$ , \*\*,  $P<0.05$ , \*\*\*,  $P<0.01$  ( $t$ -test).

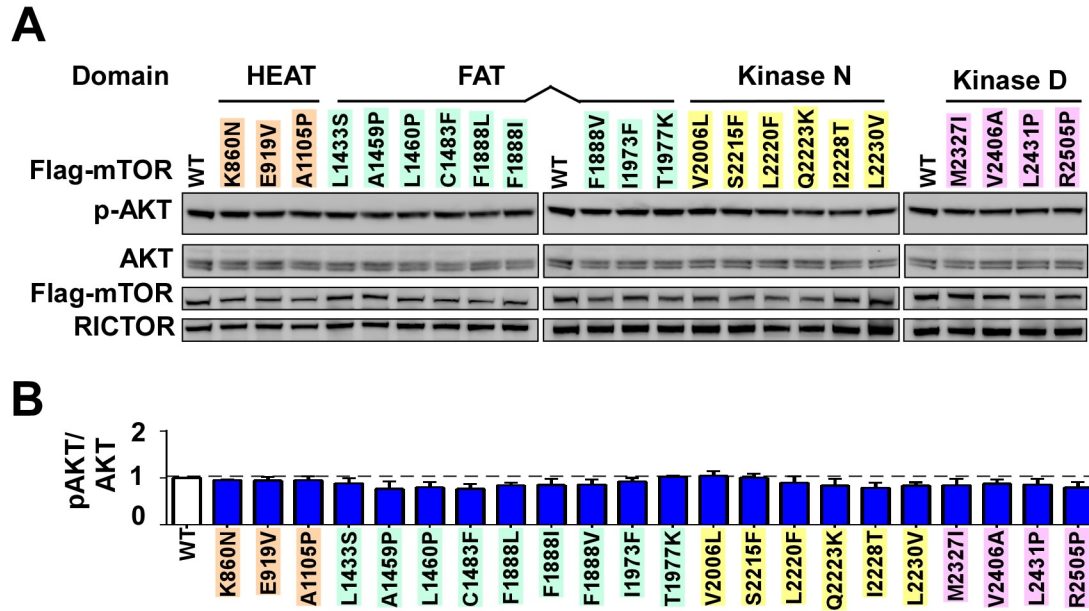

**Supplementary Figure 5**

**Supplementary Figure 5 mTOR mutations expressed at comparable levels as endogenous protein do not induce higher levels of AKT phosphorylation (S473) than WT mTOR. (A)** mTOR-silenced 293T cells were transfected with vectors expressing Flag-tagged WT or mutant mTOR. 48 hours post transfection, cells were lysed and whole cell lysates were subjected to immunoblot analysis using the indicated antibodies. **(B)** Densitometry of phosphorylated AKT (S473) versus AKT from three independent experiments is shown (mean  $\pm$  SEM, n=3 independent experiments).

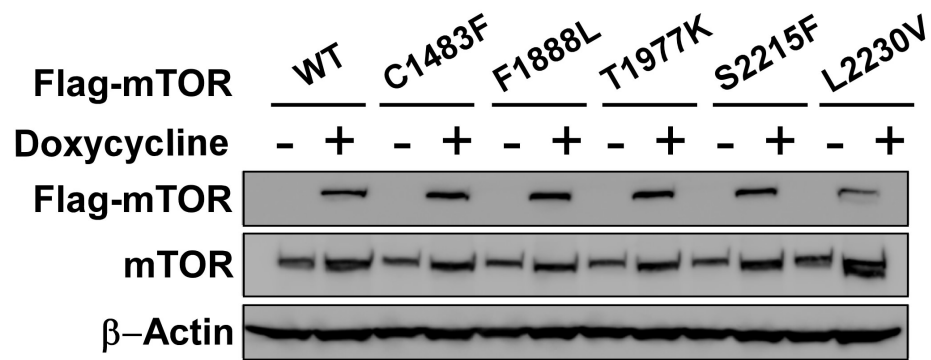

**Supplementary Figure 6**

**Supplementary Figure 6 Tetracycline-inducible expression of mTOR in HeLa cells.** HeLa cells expressing the indicated tetracycline-inducible WT or mutant mTOR were treated with doxycycline for 2 days and subjected to immunoblot analysis using the indicated antibodies.

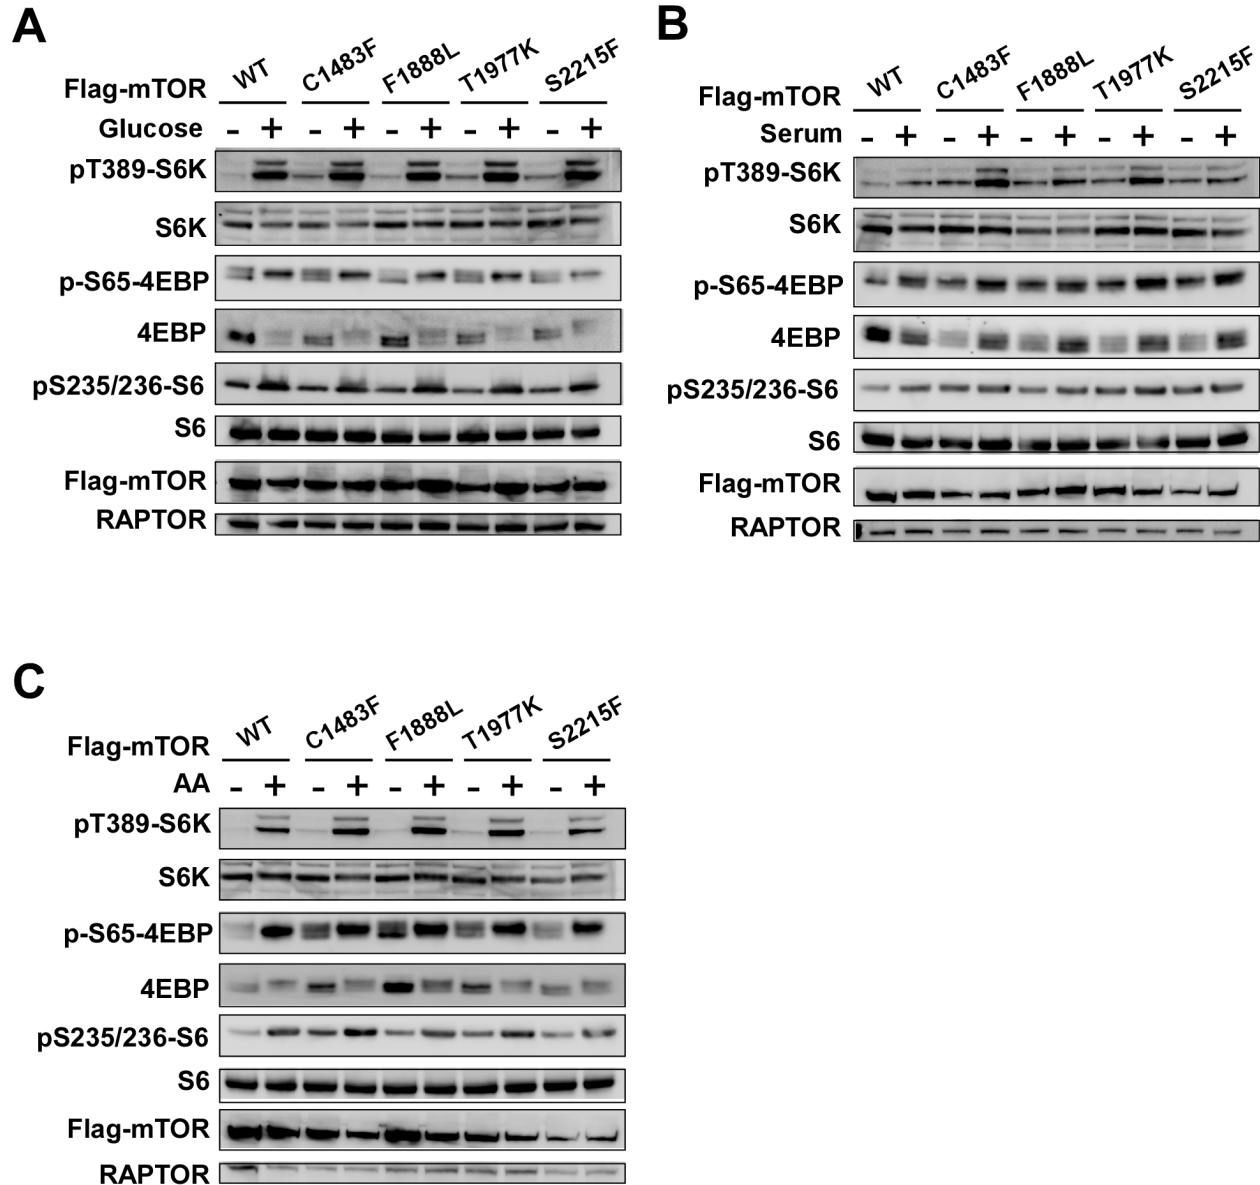

**Supplementary Figure 7**

**Supplementary Figure 7 Characterization of nutrient dependence of mTORC1 signaling conferred by mTOR activating mutations. (A-C)** Tetracycline-inducible HeLa cells expressing WT or mutant mTOR were either starved for glucose (**A**) or serum (**B**), or amino acids (**C**) for 1 hour, or starved for 1 hour and restimulated with full media for 1 hour, and subsequently subjected to immunoblot analysis using the indicated antibodies.

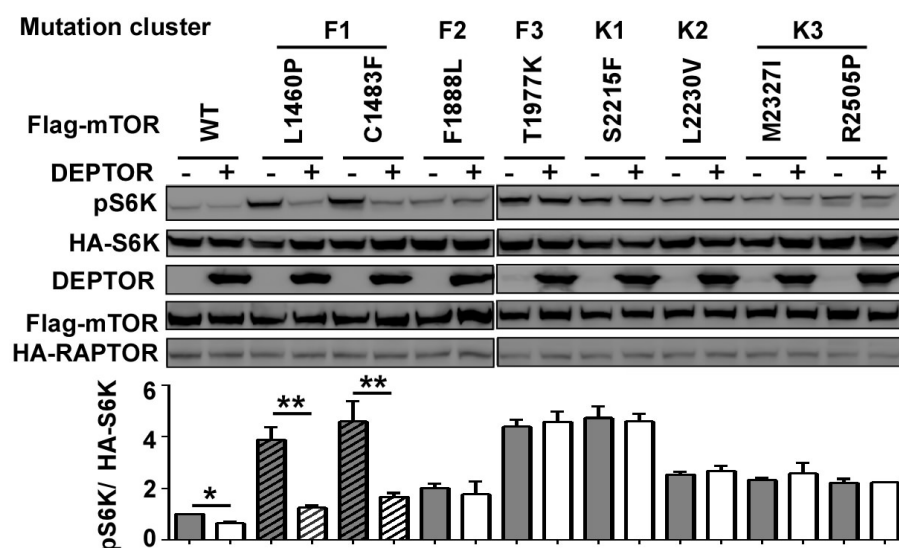

**Supplementary Figure 8**

**Supplementary Figure 8 Characterization of the response of mTOR activating mutants to DEPTOR-mediated inhibition.** 293T cells, transfected with vectors expressing HA-S6K, the indicated Flag-mTOR mutants, and either GFP or non-degradable DEPTOR, were subjected to immunoblot analysis using the indicated antibodies. Densitometry of phosphorylated S6K (T389) versus HA-S6K from three independent experiments is shown (mean  $\pm$  SEM,  $n = 3$  independent experiments). \*,  $P < 0.05$ ; \*\*,  $P < 0.01$  ( $t$ -test). The hatched bars indicate the mutants with significant inhibition by DEPTOR.



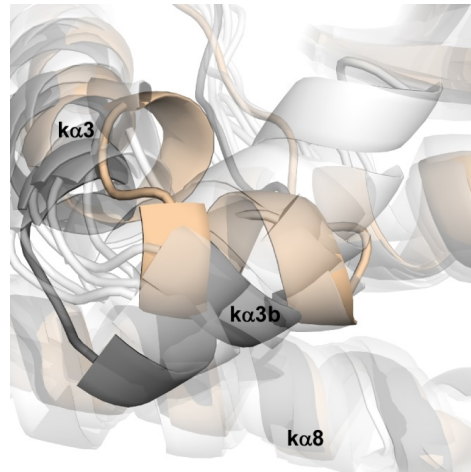

### Supplementary Figure 9

**Supplementary Figure 9 mTOR S2215F mutation can cause conformational reorganization in the vicinity of the mutation.** Superposition of helix  $\alpha 3b$  and  $\alpha 8$  of WT(gray), S2215F trajectory that is highlighted in the main text (wheat), and another eight S2215F trajectories (ghosted white) of mTOR kinase domain, at 501 ns of simulation. Of note, 5 simulation trajectories break away from the WT conformation after 100 ns of simulation, while 4 do not. One of the 10 simulations was only 471 nanoseconds. This trajectory is not shown above, but it should be noted that it was in the wild type conformation at 471 ns.

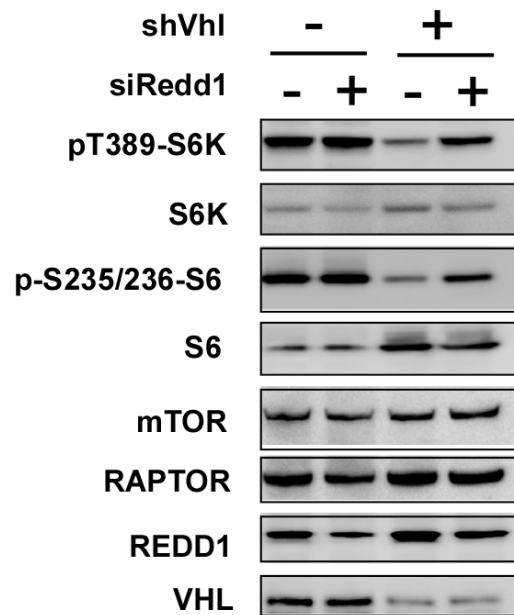

**Supplementary Figure 10**

**Supplementary Figure 10 REDD1 is a major factor in regulating mTOR downstream of VHL loss.** NIH/3T3 cells stably expressing shRNA against luciferase or Vhl were transiently transfected with siRNA targeting scramble sequence or Redd1. 48 hours post transfection, cells were harvested and whole cell lysates were subjected to immunoblot analysis using the indicated antibodies.

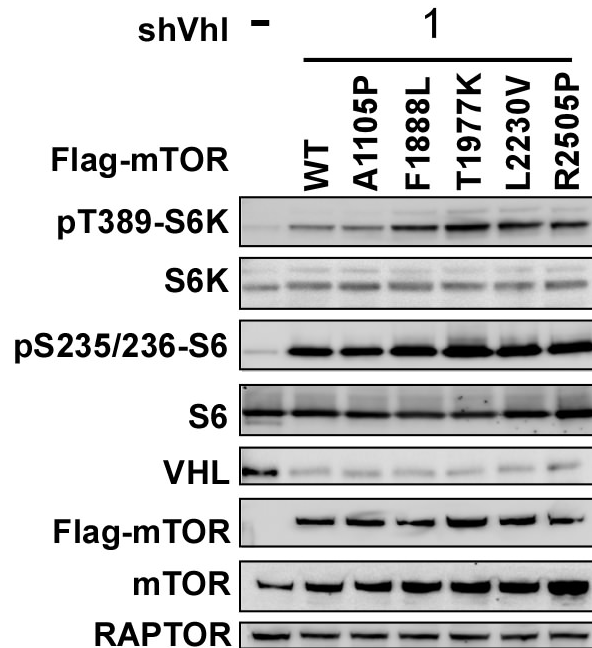

**Supplementary Figure 11**

**Supplementary Figure 11 Expression of mTOR and shRNA against Vhl in NIH/3T3 cells.** NIH/3T3 cells stably expressing shRNA against luciferase or Vhl as well as the indicated WT or mutant mTOR (A1105P, F1888L, T1977K, L2230V, and R2505P) were starved for serum for 1 hour and restimulated with full media for 1 hour before subjected to immunoblot analysis using the indicated antibodies.

**A**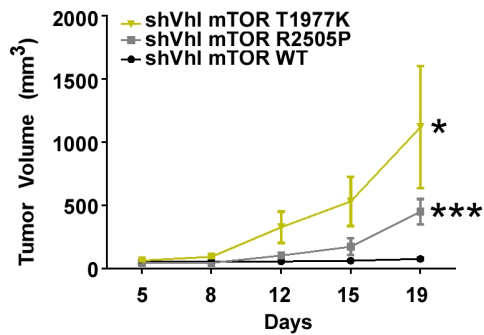**B**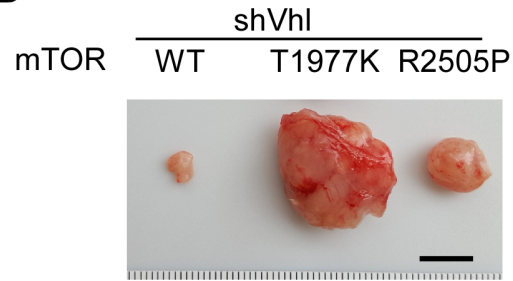**C**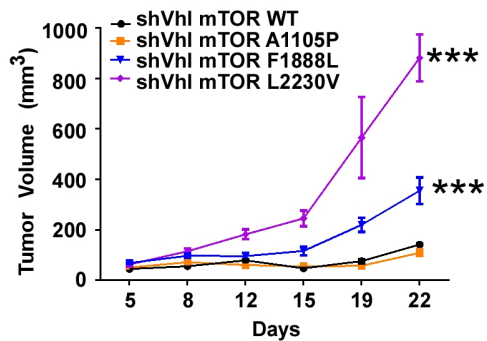**D**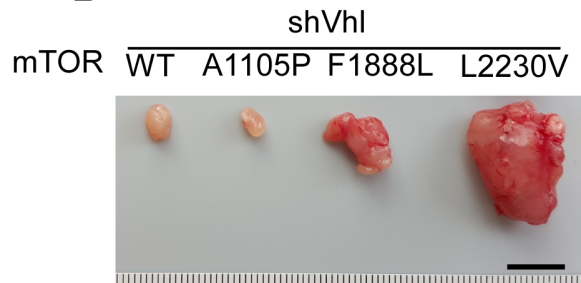**Supplementary Figure 12**

**Supplementary Figure 12 Kidney cancer-derived mTOR activating mutants can promote tumor growth *in vivo*.** (A,C) NIH/3T3 cells expressing shVhl alone or NIH/3T3 cells expressing shVhl and the indicated WT or mutant mTOR (A1105P, F1888L, T1977K, L2230V, and R2505P) were implanted subcutaneously into the flanks of 6-8 weeks-old female NSG mice. Tumor size was measured for 19-22 days. The error bars represent SEM. \*,  $P < 0.05$ , \*\*\*,  $P < 0.001$  (two way ANOVA),  $n=4$ . (B,D) Images of harvested tumors or implanted tissues at day 22 or 19. Scale bar= 1 cm.

**A**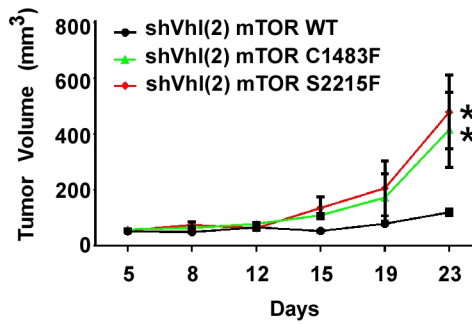**B**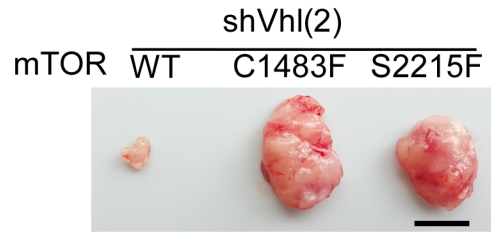**Supplementary Figure 13**

**Supplementary Figure 13 Kidney cancer-derived mTOR activating mutants can promote tumor growth *in vivo*.** (A) NIH/3T3 cells expressing shVhl (second construct) and the indicated WT or mutant mTOR (C1483F, and S2215F) were implanted subcutaneously into the flanks of 6-8 weeks-old female NSG mice. Tumor size was measured for 23 days. The error bars represent SEM. \*,  $P < 0.05$  (two way ANOVA),  $n=4$ . (B) Images of harvested tumors or implanted tissues at day 23. Scale bar= 1 cm.

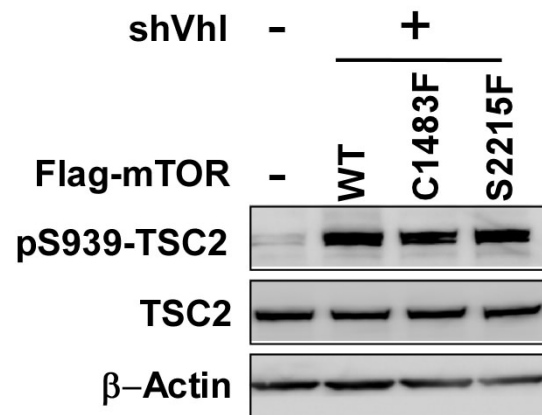

**Supplementary Figure 14**

**Supplementary Figure 14 TSC2 is phosphorylated in shVhl NIH/3T3 cells expressing WT or mutant mTOR.** NIH/3T3 cells treated with 1nM GDC0941 for 1 hour (first lane, for negative control), or shVhl NIH/3T3 cells expressing the indicated WT or mutant mTOR (C1483F, and S2215F) starved for serum for 1 hour and restimulated with full media for 1 hour were subjected to immunoblot analysis using the indicated antibodies.

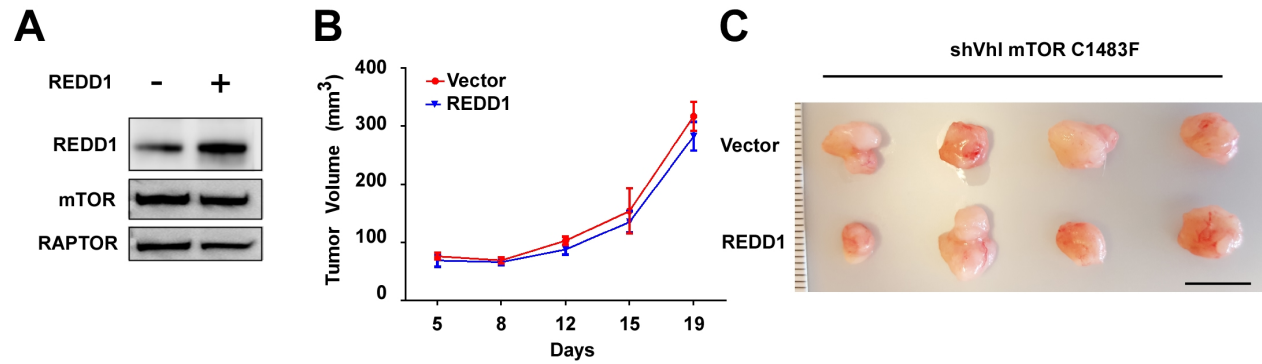

**Supplementary Figure 15**

**Supplementary Figure 15 Tumors formed by NIH/3T3 cells expressing shVhl and mutant mTOR are resistant to REDD1-mediated inhibition in vivo.** (A) NIH/3T3 cells stably expressing shVhl, mTOR mutant (C1483F), vector control or REDD1 were subjected to immunoblot analysis using the indicated antibodies. (B) NIH/3T3 cells expressing shVhl, mutant mTOR (C1483F) and vector or REDD1 were implanted subcutaneously into the flanks of 6-8 weeks-old female NSG mice. Tumor sizes were measured up to 19 days. Error bars represent SEM, n=4. (C) Images of harvested tumors or implanted tissues at day 19. Scale bar= 1 cm.

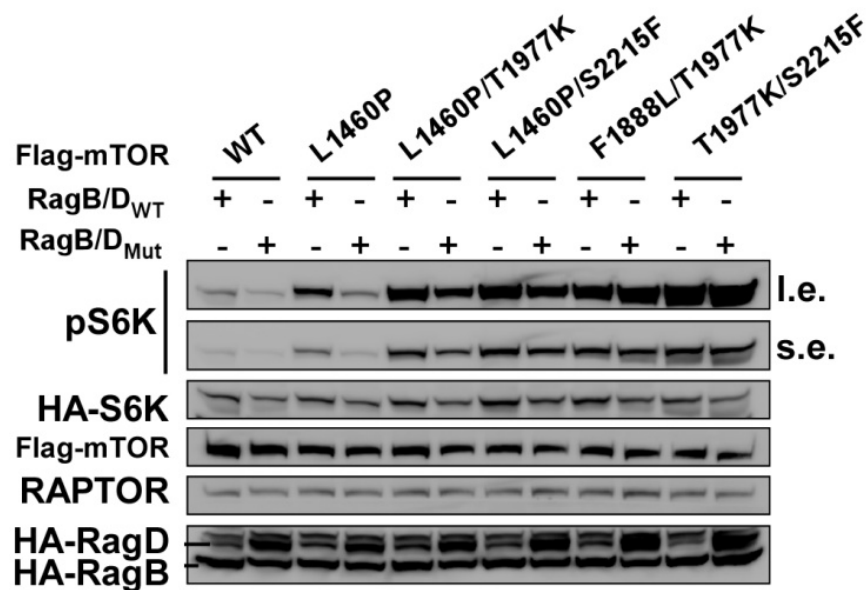

**Supplementary Figure 16**

**Supplementary Figure 16 The mTOR double mutations confer resistance to dominant-negative Rag GTPase.** 293T cells were transfected with vector expressing HA-S6K, the indicated Flag-mTOR mutants, and either RagB plus RagD (RagB/D<sub>WT</sub>) or dominant negative RagB<sup>GDP</sup> plus RagD<sup>GTP</sup> (RagB/D<sub>Mut</sub>). Whole cell lysates were subjected to immunoblot analysis using the indicated antibodies. I.e, long exposure; s.e, short exposure.



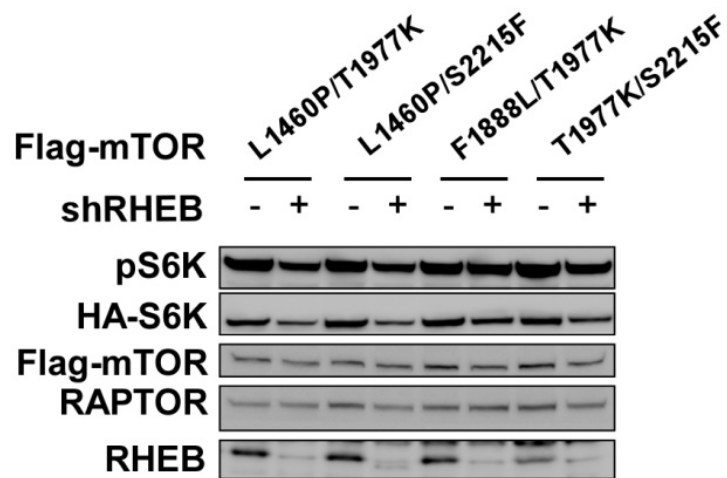

**Supplementary Figure 17**

**Supplementary Figure 17 The mTOR double mutants are not dependent on RHEB for mTORC1 signaling.** HeLa cells stably expressing shRNA against GFP or RHEB were transfected with vectors expressing HA-S6K and the indicated Flag-mTOR mutants, and analyzed by the indicated immunoblots.

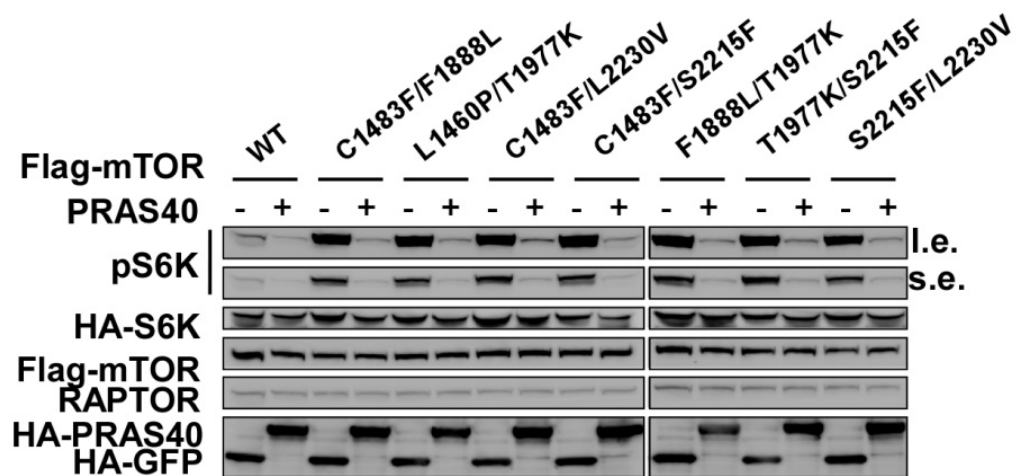

**Supplementary Figure 18**

**Supplementary Figure 18 The mTOR double mutants are sensitive to PRAS40-mediated inhibition.** 293T cells were transfected with vectors expressing HA-S6K, the indicated Flag-mTOR mutants and either GFP or PRAS40. Whole cell lysates were subjected to immunoblot analysis using the indicated antibodies. I.e, long exposure; s.e, short exposure.

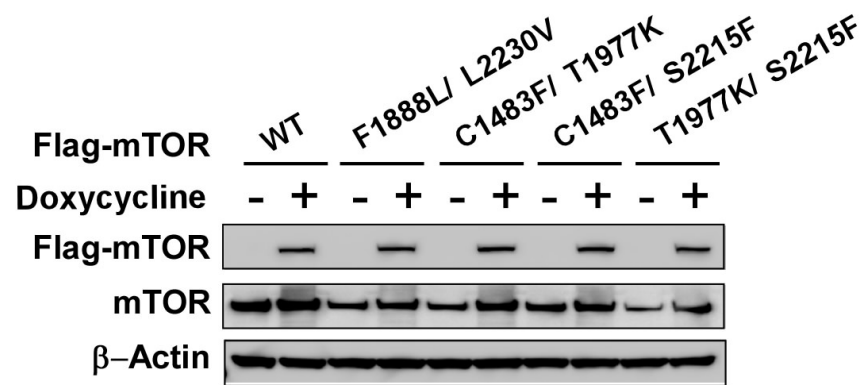

**Supplementary Figure 19**

**Supplementary Figure 19 Tetracycline-inducible expression of mTOR in HeLa cells.** HeLa cells expressing the indicated tetracycline-inducible WT or double mutant mTOR were treated with doxycycline for 2 days and subjected to immunoblot analysis using the indicated antibodies.

**A**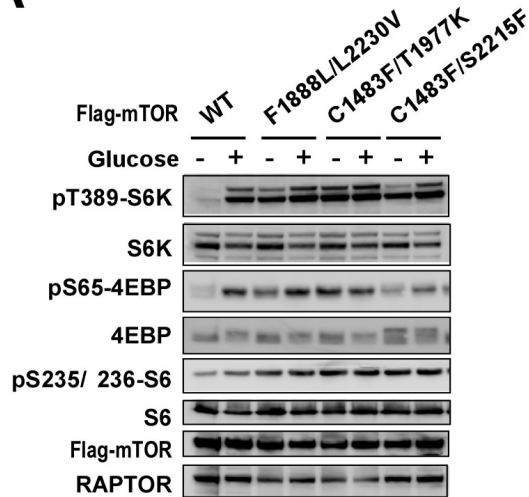**B**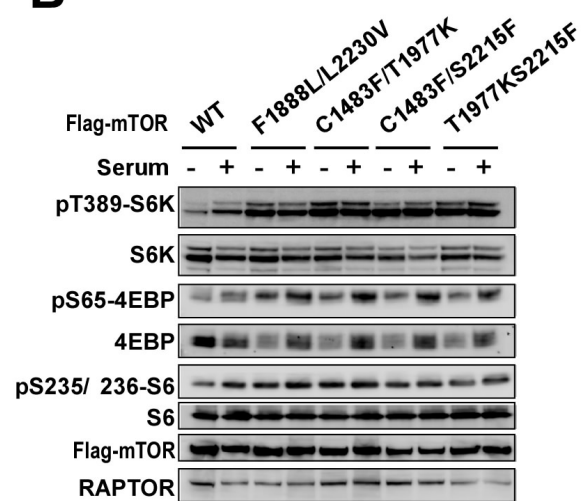**C**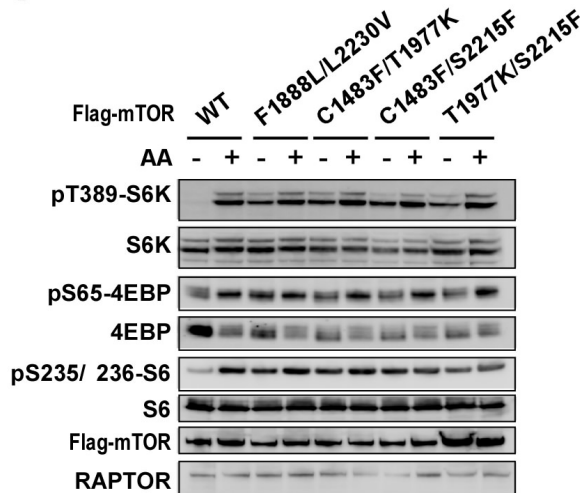**Supplementary Figure 20****Supplementary Figure 20 Characterization of nutrient dependence of mTORC1 signaling conferred by mTOR double mutations. (A-C)**

HeLa cells expressing tetracycline-inducible WT or mutant mTOR were treated with doxycycline for 48 hours to induce mTOR. Cells were then starved for glucose (A), serum (B) or amino acids (C) for 1 hour, or starved for 1 hour and restimulated with full media for 1 hour, and subjected to immunoblot analysis using the indicated antibodies.

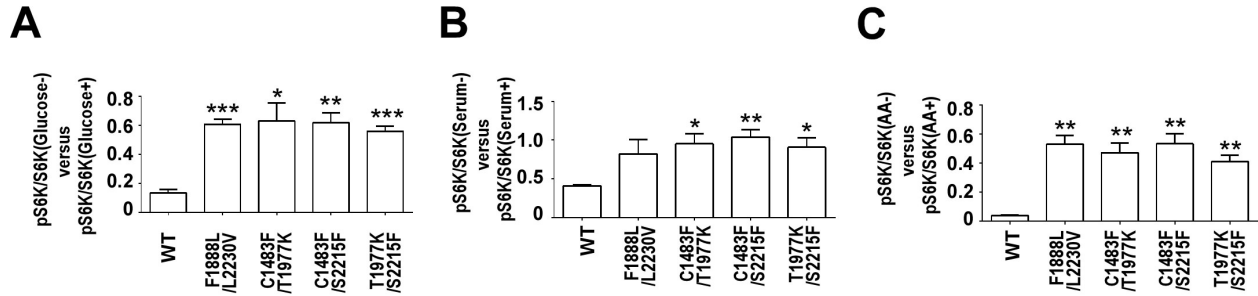

**Supplementary Figure 21**

**Supplementary Figure 21 Quantification of mTORC1 signaling of mTOR double mutations upon various nutrient deprivation versus restimulation condition. (A)** Ratio of densitometry of pS6K/HA-S6K (glucose deprivation) versus pS6K/HA-S6K (glucose restimulation). **(B)** Ratio of densitometry of pS6K/HA-S6K (Serum deprivation) versus pS6K/HA-S6K (Serum restimulation). **(C)** Ratio of densitometry of pS6K/HA-S6K (amino acid deprivation) versus pS6K/HA-S6K (amino acid restimulation). Densitometry signals are from Figure 9 A-C. For all the panels, \*,  $P < 0.05$ ; \*\*,  $P < 0.01$ ; \*\*\*,  $P < 0.001$  ( $t$ -test, comparison between indicated mutants and WT).

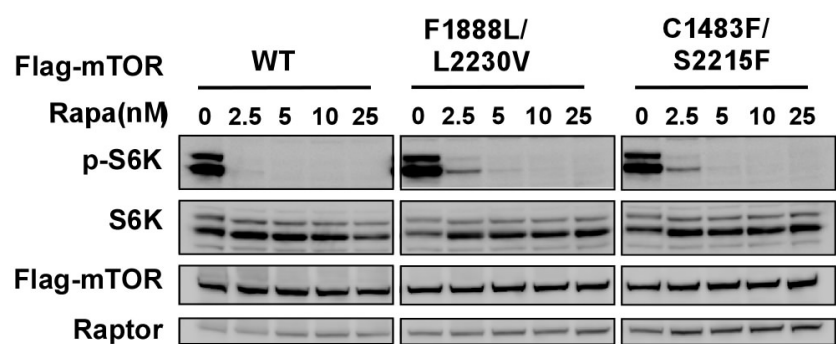

**Supplementary Figure 22**

**Supplementary Figure 22 Characterization of sensitivity to rapamycin of mTOR double mutations.** Tetracycline-inducible HeLa cells expressing WT or mutant mTOR were treated with the indicated doses of rapamycin for 1 hour prior to the immunoblot analysis using the indicated antibodies.

**Supplementary Table 1.** List of mTOR missense mutations from TCGA, COSMIC, Novartis, other publications, and current study.

| AA position | AA change | cDNA change* | Domain | Cancer relavance | ID / resources    | Reference      |
|-------------|-----------|--------------|--------|------------------|-------------------|----------------|
| 5           | G -> R    |              | HEAT   | Kidney-ccRCC     | TCGA-AK-3429-01   |                |
| 8           | A -> S    |              | HEAT   | Lung             |                   | PMID: 20190810 |
| 9           | A -> T    |              | HEAT   | Breast           | TCGA-A8-A08S-01   |                |
| 21          | V -> I    |              | HEAT   | Colorectal       | TCGA-A6-6781-01   |                |
| 30          | K -> N    |              | HEAT   | Bladder          | TCGA-FD-A6TA-01   |                |
| 41          | A -> P    |              | HEAT   | CCLC             | NCIH650_LUNG      | PMID: 24631838 |
| 41          | A -> T    |              | HEAT   | CCLC             | SKUT1_SOFT_TISSUE | PMID: 24631838 |
| 41          | A -> S    |              | HEAT   | Ovary            | TCGA-25-1329-01   | PMID: 24631838 |
| 42          | K -> M    |              | HEAT   | COSMIC           | COSMIC            |                |
| 53          | R -> Q    |              | HEAT   | Colorectal       | TCGA-AA-3877-01   |                |
| 55          | M -> I    |              | HEAT   | Head & neck      | TCGA-HL-7533-01   |                |
| 58          | E -> Q    |              | HEAT   | Breast           | Novartis          |                |
| 61          | T -> A    |              | HEAT   | Pancreas         | Novartis          |                |
| 68          | N -> K    |              | HEAT   | Lung             | TCGA-66-2765-01   |                |
| 101         | A -> V    |              | HEAT   | Melanoma         | TCGA-GF-A6C9-06   |                |
| 103         | R -> Q    |              | HEAT   | Uterus           | TCGA-AP-A059-01   |                |
| 124         | E -> D    |              | HEAT   | Uterus           | TCGA-B5-A0JY-01   |                |
| 125         | M -> I    |              | HEAT   | Esophagus        | ESCC-D16          |                |
| 133         | L -> V    |              | HEAT   | Breast           | TCGA-BH-A0DZ-01   |                |
| 135         | M -> T    |              | HEAT   | COSMIC           | COSMIC            | PMID: 20190810 |
| 135         | M -> V    |              | HEAT   | Liver            | TCGA-G3-A5SJ-01   |                |
| 140         | F -> L    |              | HEAT   | CCLC             | NCIH2066_LUNG     |                |
| 161         | N -> S    |              | HEAT   | COSMIC           | COSMIC            |                |
| 163         | G -> S    |              | HEAT   | Stomach          | Novartis          |                |
| 173         | R -> C    |              | HEAT   | Liver            | H112345           |                |
| 178         | S -> N    |              | HEAT   | COSMIC           | COSMIC            |                |
| 180         | P -> S    |              | HEAT   | Melanoma         | TCGA-EE-A29G-06   |                |
| 188         | Q -> R    |              | HEAT   | COSMIC           | COSMIC            |                |
| 194         | I -> V    |              | HEAT   | Uterus           | TCGA-D1-A17Q-01   |                |
| 199         | W -> L    |              | HEAT   | Lung             | LUAD-S01478       |                |
| 203         | Q -> H    |              | HEAT   | Lung             | LUAD-B00523       |                |
| 204         | A -> T    |              | HEAT   | Melanoma         | YUKLAB            |                |
| 211         | A -> V    |              | HEAT   | Esophagus        | ESO-859           |                |
| 237         | T -> A    |              | HEAT   | CCLC             | SNU410_PANCREAS   |                |

|     |        |  |      |               |                  |  |
|-----|--------|--|------|---------------|------------------|--|
| 241 | A -> S |  | HEAT | COSMIC        | COSMIC           |  |
| 243 | K -> R |  | HEAT | CCLE          | REH_HAEMATOPOIET |  |
| 250 | A -> V |  | HEAT | Colorectal    | TCGA-AA-3663-01  |  |
| 256 | N -> S |  | HEAT | Breast        | TCGA-BH-A0E6-01  |  |
| 260 | R -> Q |  | HEAT | Esophagus     | TCGA-VQ-A8P2-01  |  |
| 261 | I -> V |  | HEAT | CCLE          | 2313287_STOMACH  |  |
| 262 | H -> R |  | HEAT | CCLE          | 2313287_STOMACH  |  |
| 267 | I -> V |  | HEAT | Stomach       | TCGA-BR-6452-01  |  |
| 270 | E -> K |  | HEAT | Stomach       | TCGA-HU-A4GX-01  |  |
| 270 | E -> K |  | HEAT | Uterus        | TCGA-B5-A0JY-01  |  |
| 275 | S -> T |  | HEAT | CCLE          | KCL22_HAEMATOPOI |  |
| 281 | R -> C |  | HEAT | NCI60         | HCC_2998         |  |
| 281 | R -> H |  | HEAT | Ovary         | TCGA-61-1733-01  |  |
| 281 | R -> C |  | HEAT | Stomach       | TCGA-BR-4184-01  |  |
| 291 | Q -> L |  | HEAT | COSMIC        | COSMIC           |  |
| 293 | Q -> K |  | HEAT | COSMIC        | COSMIC           |  |
| 298 | K -> E |  | HEAT | COSMIC        | COSMIC           |  |
| 304 | M -> I |  | HEAT | Lung          | TCGA-44-6145-01  |  |
| 311 | R -> C |  | HEAT | Stomach       | TCGA-BR-8382-01  |  |
| 314 | T -> N |  | HEAT | COSMIC        | COSMIC           |  |
| 336 | Y -> C |  | HEAT | Stomach       | TCGA-CG-5723-01  |  |
| 342 | L -> P |  | HEAT | CCLE          | CCK81_LARGE_INTE |  |
| 370 | F -> Y |  | HEAT | Ovary         | TCGA-23-1122-01  |  |
| 373 | V -> L |  | HEAT | Kidney-nccRCC | TCGA-BQ-7061-01  |  |
| 382 | N -> S |  | HEAT | Breast        | Novartis         |  |
| 384 | K -> R |  | HEAT | Stomach       | TCGA-CG-4442-01  |  |
| 384 | K -> N |  | HEAT | Uterus        | TCGA-BS-A0UV-01  |  |
| 385 | N -> I |  | HEAT | Melanoma      | TCGA-D3-A2JH-06  |  |
| 386 | S -> W |  | HEAT | COSMIC        | COSMIC           |  |
| 398 | R -> C |  | HEAT | Lung          | 631056           |  |
| 403 | R -> Q |  | HEAT | Colorectal    | 587222           |  |
| 410 | T -> N |  | HEAT | Breast        | TCGA-A7-A26J-01  |  |
| 416 | T -> A |  | HEAT | Stomach       | TCGA-BR-A4QL-01  |  |
| 420 | V -> I |  | HEAT | CCLE          | 22RV1_PROSTATE   |  |
| 431 | T -> A |  | HEAT | CCLE          | SNU1_STOMACH     |  |
| 432 | A -> V |  | HEAT | Breast        | Novartis         |  |
| 432 | A -> V |  | HEAT | Liver         | Novartis         |  |
| 438 | G -> W |  | HEAT | COSMIC        | COSMIC           |  |
| 440 | L -> F |  | HEAT | Lung          | LUAD-NYU284      |  |
| 443 | A -> T |  | HEAT | Breast        | Novartis         |  |
| 447 | E -> Q |  | HEAT | Cervix        | TCGA-JW-A5VL-01  |  |



|     |        |  |      |             |                      |  |
|-----|--------|--|------|-------------|----------------------|--|
| 453 | P -> L |  | HEAT | CCLE        | COLO792_SKIN         |  |
| 469 | A -> T |  | HEAT | Colorectal  | TCGA-AA-3715-01      |  |
| 471 | K -> T |  | HEAT | Stomach     | TCGA-BR-8589-01      |  |
| 475 | A -> G |  | HEAT | Breast      | TCGA-A8-A09B-01      |  |
| 476 | M -> V |  | HEAT | Breast      | Novartis             |  |
| 477 | Q -> H |  | HEAT | Stomach     | TCGA-F1-6177-01      |  |
| 480 | A -> T |  | HEAT | Uterus      | TCGA-B5-A11E-01      |  |
| 488 | M -> I |  | HEAT | CCLE        | CW2_LARGE_INTEST     |  |
| 491 | R -> Q |  | HEAT | Colorectal  | 587246               |  |
| 492 | A -> T |  | HEAT | Brain/CNS   | TCGA-02-0083-01      |  |
| 523 | D -> Y |  | HEAT | COSMIC      | COSMIC               |  |
| 536 | Q -> P |  | HEAT | Lung        | TCGA-69-7980-01      |  |
| 537 | D -> N |  | HEAT | COSMIC      | COSMIC               |  |
| 545 | L -> M |  | HEAT | Esophagus   | TCGA-L5-A40H-01      |  |
| 547 | L -> F |  | HEAT | Melanoma    | TCGA-D3-A2JF-06      |  |
| 551 | P -> L |  | HEAT | Melanoma    | TCGA-EE-A20B-06      |  |
| 551 | P -> L |  | HEAT | Melanoma    | TCGA-IH-A3EA-01      |  |
| 553 | R -> H |  | HEAT | COSMIC      | COSMIC               |  |
| 570 | L -> F |  | HEAT | Melanoma    | TCGA-EE-A2A5-06      |  |
| 571 | T -> K |  | HEAT | CCLE        | MOLM13_HAEMATOP<br>O |  |
| 571 | T -> M |  | HEAT | Colorectal  | TCGA-AA-3854-01      |  |
| 571 | T -> M |  | HEAT | Stomach     | Novartis             |  |
| 573 | L -> F |  | HEAT | CCLE        | KYM1_SOFT_TISSUE     |  |
| 578 | D -> Y |  | HEAT | COSMIC      | COSMIC               |  |
| 588 | T -> M |  | HEAT | CCLE        | SNU175_LARGE_INT     |  |
| 598 | S -> F |  | HEAT | Melanoma    | YULAN                |  |
| 602 | F -> L |  | HEAT | Head & neck | TCGA-CV-6933-01      |  |
| 604 | R -> C |  | HEAT | Stomach     | TCGA-BR-8680-01      |  |
| 604 | R -> H |  | HEAT | Uterus      | TCGA-AP-A0LM-01      |  |
| 607 | A -> V |  | HEAT | Lung        | TCGA-22-5473-01      |  |
| 610 | F -> V |  | HEAT | Stomach     | TCGA-BR-8589-01      |  |
| 622 | A -> D |  | HEAT | COSMIC      | COSMIC               |  |
| 623 | A -> T |  | HEAT | COSMIC      | COSMIC               |  |
| 624 | R -> H |  | HEAT | Bladder     | DS-bla-018           |  |
| 624 | R -> H |  | HEAT | Uterus      | TCGA-AP-A0LM-01      |  |
| 628 | R -> H |  | HEAT | Colorectal  | 587342               |  |
| 637 | I -> V |  | HEAT | Breast      | Novartis             |  |
| 639 | G -> D |  | HEAT | Lung        | LUAD-S01405          |  |
| 640 | H -> R |  | HEAT | Breast      | Novartis             |  |
| 642 | H -> Y |  | HEAT | Melanoma    | TCGA-EB-A431-01      |  |
| 645 | S -> C |  | HEAT | CCLE        | NCIH1568_LUNG        |  |

|     |        |         |      |              |                   |               |
|-----|--------|---------|------|--------------|-------------------|---------------|
| 647 | T -> I |         | HEAT | CCLE         | OVK18_OVARY       |               |
| 648 | A -> T |         | HEAT | Colorectal   | TCGA-AA-3821-01   |               |
| 668 | D -> Y |         | HEAT | Lung         | TCGA-69-7980-01   |               |
| 670 | D -> H |         | HEAT | Liver        | TCGA-CC-A5UC-01   |               |
| 672 | R -> C |         | HEAT | Melanoma     | TCGA-ER-A19F-06   |               |
| 681 | E -> D |         | HEAT | Stomach      | Novartis          |               |
| 691 | E -> D |         | HEAT | CCLE         | HCC1171_LUNG      |               |
| 695 | A -> V |         | HEAT | CCLE         | HT115_LARGE_INTE  |               |
| 695 | A -> S |         | HEAT | COSMIC       | COSMIC            |               |
| 695 | A -> D |         | HEAT | COSMIC       | COSMIC            |               |
| 696 | L -> F |         | HEAT | Colorectal   | TCGA-A6-6651-01   |               |
| 699 | A -> P |         | HEAT | Lung         | TCGA-37-4135-01   |               |
| 704 | V -> M |         | HEAT | CCLE         | HEC6_ENDOMETRIUM  |               |
| 706 | E -> Q |         | HEAT | Lung         | TCGA-49-4486-01   |               |
| 709 | E -> G |         | HEAT | Head & neck  | TCGA-CV-5966-01   |               |
| 716 | G -> S |         | HEAT | Colorectal   | 587336            |               |
| 716 | G -> D |         | HEAT | Lung         | TCGA-91-6829-01   |               |
| 717 | R -> Q |         | HEAT | Bladder      | TCGA-BT-A20R-01   |               |
| 717 | R -> L | 2150G>T | HEAT | Kidney-ccRCC | Novartis RECORD-3 |               |
| 717 | R -> L |         | HEAT | Lung         | 585270            |               |
| 720 | S -> I |         | HEAT | Lung         | LUAD-5V8LT        |               |
| 722 | N -> D |         | HEAT | Stomach      | TCGA-BR-8487-01   |               |
| 735 | I -> S |         | HEAT | Lung         | TCGA-18-3421-01   |               |
| 735 | I -> N |         | HEAT | Stomach      | pfg008T           |               |
| 738 | L -> F |         | HEAT | Breast       | TCGA-E9-A228-01   |               |
| 745 | G -> W |         | HEAT | Prostate     | TCGA-HC-7081-01   |               |
| 754 | A -> G |         | HEAT | Ovary        | TCGA-29-1691-01   |               |
| 755 | R -> H |         | HEAT | COSMIC       | COSMIC            |               |
| 755 | R -> L |         | HEAT | Lymph        | M025              |               |
| 773 | E -> D |         | HEAT | Uterus       | TCGA-AP-A051-01   |               |
| 783 | L -> R |         | HEAT | Colorectal   | 587376            |               |
| 789 | D -> V |         | HEAT | Colorectal   | TCGA-AA-3867-01   |               |
| 822 | I -> V |         | HEAT | Esophagus    | TCGA-LN-A4A5-01   |               |
| 825 | M -> I |         | HEAT | CCLE         | KCL22_HAEMATOPOI  |               |
| 835 | A -> T |         | HEAT | COSMIC       | COSMIC            |               |
| 835 | A -> S |         | HEAT | Uterus       | TCGA-AP-A059-01   |               |
| 838 | Q -> L |         | HEAT | COSMIC       | COSMIC            |               |
| 844 | L -> M |         | HEAT | Esophagus    | TCGA-L5-A891-01   |               |
| 858 | Y -> C |         | HEAT | COSMIC       | COSMIC            |               |
| 860 | K -> N |         | HEAT | Kidney-ccRCC | TCGA-B0-5119-01   | Current study |
| 861 | Y -> H |         | HEAT | CCLE         | EN_ENDOMETRIUM    |               |

|      |        |  |      |              |                  |                                 |
|------|--------|--|------|--------------|------------------|---------------------------------|
| 866  | E -> K |  | HEAT | Colorectal   | TCGA-AA-3956-01  |                                 |
| 875  | E -> K |  | HEAT | Ovary        | TCGA-04-1338-01  |                                 |
| 878  | Q -> P |  | HEAT | Lung         | TCGA-95-7567-01  |                                 |
| 881  | R -> C |  | HEAT | Stomach      | TCGA-BR-8487-01  |                                 |
| 886  | R -> C |  | HEAT | Stomach      | pfg008T          |                                 |
| 888  | L -> F |  | HEAT | COSMIC       | COSMIC           |                                 |
| 891  | L -> V |  | HEAT | Uterus       | TCGA-AX-A0J0-01  |                                 |
| 904  | G -> V |  | HEAT | Liver        | H060638          |                                 |
| 910  | R -> Q |  | HEAT | Stomach      | TCGA-HU-A4GQ-01  |                                 |
| 911  | D -> Y |  | HEAT | Lung         | LUAD-NYU1051S    |                                 |
| 915  | V -> F |  | HEAT | Esophagus    | TCGA-RD-A8MV-01  |                                 |
| 919  | E -> V |  | HEAT | Kidney-ccRCC |                  | Current study<br>PMID: 24622468 |
| 928  | D -> N |  | HEAT | Melanoma     | TCGA-D3-A51N-06  |                                 |
| 929  | Y -> C |  | HEAT | Breast       | Novartis         |                                 |
| 933  | E -> K |  | HEAT | Esophagus    | TCGA-LN-A49M-01  |                                 |
| 957  | R -> Q |  | HEAT | Stomach      | TCGA-BR-8361-01  |                                 |
| 968  | H -> Y |  | HEAT | COSMIC       | COSMIC           |                                 |
| 981  | S -> F |  | HEAT | Melanoma     | MEL-JWCI-WGS-22  |                                 |
| 1002 | R -> Q |  | HEAT | Esophagus    | ESCC-233T        |                                 |
| 1009 | R -> L |  | HEAT | Lung         | TCGA-18-3414-01  |                                 |
| 1009 | R -> L |  | HEAT | Melanoma     | ME050            |                                 |
| 1022 | F -> S |  | HEAT | Uterus       | TCGA-BG-A0M4-01  |                                 |
| 1033 | E -> K |  | HEAT | CCLE         | VMCUB1_URINARY_T |                                 |
| 1036 | T -> N |  | HEAT | Colorectal   | TCGA-CM-4752-01  |                                 |
| 1044 | M -> I |  | HEAT | Lung         | TCGA-91-6840-01  |                                 |
| 1048 | I -> L |  | HEAT | Breast       | TCGA-AN-A046-01  |                                 |
| 1063 | L -> F |  | HEAT | Colorectal   | TCGA-AA-3984-01  |                                 |
| 1066 | E -> D |  | HEAT | Uterus       | TCGA-D1-A0ZO-01  |                                 |
| 1067 | F -> V |  | HEAT | Stomach      | pfg062T          |                                 |
| 1078 | M -> I |  | HEAT | Colorectal   | TCGA-G4-6320-01  |                                 |
| 1080 | R -> P |  | HEAT | Cervix       | TCGA-EA-A556-01  |                                 |
| 1080 | R -> C |  | HEAT | Colorectal   | TCGA-G4-6298-01  |                                 |
| 1083 | M -> V |  | HEAT | Breast       | Novartis         |                                 |
| 1087 | S -> N |  | HEAT | CCLE         | SNU1040_LARGE_IN |                                 |
| 1103 | F -> Y |  | HEAT | Ovary        | TCGA-04-1525-01  |                                 |
| 1105 | A -> P |  | HEAT | Kidney-ccRCC | TCGA-CJ-4887     | Current study                   |
| 1105 | A -> T |  | HEAT | Melanoma     | TCGA-ER-A2NF-01  |                                 |
| 1105 | A -> T |  | HEAT | Melanoma     | TCGA-ER-A2NF-06  |                                 |
| 1105 | A -> T |  | HEAT | Ovary        | TCGA-24-2254-01  |                                 |
| 1106 | N -> K |  | HEAT | Ovary        | TCGA-24-1556-01  |                                 |
| 1117 | P -> S |  | HEAT | Melanoma     | YUBER            |                                 |

|      |        |  |      |             |                    |                |
|------|--------|--|------|-------------|--------------------|----------------|
| 1124 | A -> V |  | HEAT | Uterus      | TCGA-AP-A0LE-01    |                |
| 1134 | A -> V |  | HEAT | Breast      | Novartis           |                |
| 1134 | A -> V |  | HEAT | CCLE        | ABC1_LUNG          |                |
| 1134 | A -> V |  | HEAT | CCLE        | MOTN1_HAEMATOPOI   |                |
| 1134 | A -> T |  | HEAT | NCI60       | MOLT_4             |                |
| 1134 | A -> V |  | HEAT | Stomach     | Novartis           |                |
| 1141 | R -> S |  | HEAT | Lung        | TCGA-18-3416-01    |                |
| 1145 | S -> F |  | HEAT | Melanoma    | MEL-JWCI-WGS-34    |                |
| 1151 | Y -> C |  | HEAT | CCLE        | C2BBE1_LARGE_INT   |                |
| 1151 | Y -> C |  | HEAT | Lung        | TCGA-38-4631-01    |                |
| 1160 | V -> G |  | HEAT | Uterus      | TCGA-BK-A0C9-01    |                |
| 1161 | R -> Q |  | HEAT | CCLE        | DMS454_LUNG        |                |
| 1161 | R -> Q |  | HEAT | Head & neck | HN_62469           |                |
| 1164 | D -> N |  | HEAT | Breast      | Novartis           |                |
| 1170 | R -> H |  | HEAT | Esophagus   | ESO-161            |                |
| 1178 | S -> F |  | HEAT | CCLE        | J82_URINARY_TRACT  |                |
| 1186 | K -> E |  | HEAT | COSMIC      | COSMIC             |                |
| 1190 | I -> L |  | HEAT | COSMIC      | COSMIC             |                |
| 1193 | P -> L |  | HEAT | CCLE        | COLO201_LARGE_IN   |                |
| 1193 | P -> L |  | HEAT | CCLE        | COLO205_LARGE_IN   |                |
| 1199 | L -> M |  | HEAT | Pancreas    | TCGA-IB-7651-01    |                |
| 1201 | R -> Q |  | HEAT | CCLE        | AN3CA_ENDOMETRIUM  |                |
| 1208 | R -> C |  | HEAT | Breast      | Novartis           |                |
| 1208 | R -> C |  | HEAT | CCLE        | HEC59_ENDOMETRIUM  | PMID: 24631838 |
| 1208 | R -> C |  | HEAT | CCLE        | KALS1_CENTRAL_NE   | PMID: 24631838 |
| 1208 | R -> C |  | HEAT | CCLE        | KYSE510_OESOPHAGUS | PMID: 24631838 |
| 1213 | I -> V |  | HEAT | COSMIC      | COSMIC             |                |
| 1215 | R -> T |  | HEAT | Breast      | TCGA-E2-A1IN-01    |                |
| 1224 | D -> Y |  | HEAT | Breast      | Novartis           |                |
| 1225 | E -> K |  | HEAT | Pancreas    | TCGA-HZ-8636-01    |                |
| 1239 | S -> N |  | HEAT | Uterus      | TCGA-BG-A0MC-01    |                |
| 1241 | Q -> R |  | HEAT | Brain/CNS   | Sample_16          |                |
| 1244 | A -> E |  | HEAT | Colorectal  | TCGA-AA-3663-01    |                |
| 1254 | P -> T |  | HEAT | CCLE        | KCL22_HAEMATOPOI   |                |
| 1254 | P -> L |  | HEAT | CCLE        | KM12_LARGE_INTES   |                |
| 1266 | Q -> K |  | HEAT | Esophagus   | TCGA-JY-A6F8-01    |                |
| 1271 | A -> T |  | HEAT | Lung        | S00837             |                |
| 1276 | S -> F |  | HEAT | CCLE        | HEC265_ENDOMETRIUM |                |
| 1280 | W -> C |  | HEAT | Lung        | TCGA-64-5781-01    |                |

|      |        |         |      |               |                   |                                               |
|------|--------|---------|------|---------------|-------------------|-----------------------------------------------|
| 1301 | R -> L |         | HEAT | Lung          | LUAD-NYU160       |                                               |
| 1303 | C -> F |         | HEAT | Colorectal    | TCGA-AA-3980-01   |                                               |
| 1304 | W -> R |         | HEAT | CCLE          | KMRC20_KIDNEY     |                                               |
| 1312 | P -> L |         | HEAT | Colorectal    | TCGA-AA-3710-01   |                                               |
| 1313 | M -> I |         | HEAT | COSMIC        | COSMIC            |                                               |
| 1313 | M -> L |         | HEAT | Lung          | LUAD-RT-S01699    |                                               |
| 1315 | R -> S |         | HEAT | CCLE          | NCIH1930_LUNG     |                                               |
| 1332 | D -> N |         | HEAT | Uterus        | TCGA-AP-A059-01   |                                               |
| 1337 | L -> I |         | HEAT | COSMIC        | COSMIC            |                                               |
| 1368 | D -> N |         | FAT  | Stomach       | Novartis          |                                               |
| 1378 | N -> S |         | FAT  | Liver         | Novartis          |                                               |
| 1395 | K -> E |         | FAT  | COSMIC        | COSMIC            |                                               |
| 1408 | P -> S |         | FAT  | CCLE          | CW2_LARGE_INTEST  |                                               |
| 1409 | T -> P |         | FAT  | Lung          | LUAD-S01302       |                                               |
| 1426 | P -> L |         | FAT  | Colorectal    | TCGA-AZ-6601-01   |                                               |
| 1427 | E -> Q |         | FAT  | CCLE          | MDAMB361_BREAST   |                                               |
| 1428 | A -> T |         | FAT  | COSMIC        | COSMIC            | PMID: 24631838                                |
| 1428 | A -> V |         | FAT  | COSMIC        | COSMIC            |                                               |
| 1430 | A -> V |         | FAT  | Uterus        | TCGA-B5-A11E-01   | PMID: 17360675                                |
| 1431 | G -> R |         | FAT  | Colorectal    | EV-026-P          |                                               |
| 1431 | G -> R |         | FAT  | Colorectal    | TCGA-G4-6309-01   |                                               |
| 1433 | L -> S |         | FAT  | Breast        | SA237             | PMID: 24631838                                |
| 1433 | L -> S |         | FAT  | Kidney-ccRCC  | TCGA-BP-5001-01   | Current study,<br>PMID: 24631838,             |
| 1433 | L -> S |         | FAT  | Kidney-nccRCC | 9266920           | PMID: 24631838                                |
| 1452 | K -> N |         | FAT  | Kidney-ccRCC  | TCGA-CZ-5987-01   | PMID: 24631838                                |
| 1456 | W -> R |         | FAT  | CCLE          | NALM6_HAEMATOPOI  |                                               |
| 1459 | A -> D | 4376C>A | FAT  | Kidney-ccRCC  | Novartis RECORD-3 |                                               |
| 1459 | A -> P |         | FAT  | Kidney-ccRCC  | TCGA-BP-5176-01   | Current study,<br>PMID: 24631838,<br>17360675 |
| 1460 | L -> P |         | FAT  | Kidney-ccRCC  | TCGA-B0-5701-01   | Current study                                 |
| 1460 | L -> P |         | FAT  | Kidney-ccRCC  | TCGA-BP-5175-01   | Current study                                 |
| 1461 | V -> A |         | FAT  | Breast        | Novartis          |                                               |
| 1461 | V -> L |         | FAT  | Ovary         | TCGA-61-1907-01   |                                               |
| 1463 | Y -> S |         | FAT  | Kidney-ccRCC  | TCGA-B0-5697-01   | PMID: 24631838                                |
| 1465 | K -> N |         | FAT  | COSMIC        | COSMIC            |                                               |
| 1467 | M -> I |         | FAT  | Cervix        | TCGA-DG-A2KM-01   |                                               |
| 1473 | D -> H |         | FAT  | Bladder       | B25               |                                               |
| 1480 | R -> H |         | FAT  | Colorectal    | TCGA-AU-6004-01   |                                               |
| 1482 | R -> H |         | FAT  | Breast        | Novartis          |                                               |
| 1482 | R -> C |         | FAT  | Breast        | Novartis          |                                               |

|      |        |  |     |              |                      |                                               |
|------|--------|--|-----|--------------|----------------------|-----------------------------------------------|
| 1482 | R -> C |  | FAT | CCLE         | MFE296_ENDOMETRIUM   |                                               |
| 1482 | R -> C |  | FAT | Stomach      | TCGA-HJ-7597-01      |                                               |
| 1483 | C -> R |  | FAT | Brain/CNS    |                      | PMID: 24631838                                |
| 1483 | C -> W |  | FAT | Breast       | BR-M-059             | PMID: 24631838                                |
| 1483 | C -> Y |  | FAT | CCLE         | MOLT16_HAEMATOP<br>O | PMID: 24631838                                |
| 1483 | C -> F |  | FAT | Kidney-ccRCC |                      | Current study,<br>PMID: 24631838,<br>17360675 |
| 1483 | C -> Y |  | FAT | Kidney-ccRCC | TCGA-B0-5696-01      |                                               |
| 1485 | E->K   |  | FAT |              |                      | PMID: 24631838                                |
| 1491 | G -> S |  | FAT | CCLE         | EM2_HAEMATOPOIET     |                                               |
| 1492 | Q -> R |  | FAT | Breast       | Novartis             |                                               |
| 1494 | H -> R |  | FAT | CCLE         | HEC265_ENDOMETRIUM   |                                               |
| 1497 | C -> F |  | FAT | NCI60        | HCC_2998             |                                               |
| 1502 | T -> A |  | FAT | Prostate     | TCGA-HC-A48F-01      |                                               |
| 1513 | A -> T |  | FAT | Uterus       | TCGA-D1-A17F-01      |                                               |
| 1514 | R -> Q |  | FAT | Lymph        | DLBCL-MAYO_DLCL      |                                               |
| 1517 | A -> V |  | FAT | Breast       | TCGA-D8-A1J8-01      |                                               |
| 1519 | A -> T |  | FAT | Kidney-ccRCC | TCGA-CJ-6027-01      | PMID: 24631838                                |
| 1524 | G -> V |  | FAT | Head & neck  | TCGA-CR-7388-01      |                                               |
| 1544 | A -> T |  | FAT | Esophagus    | TCGA-JY-A6FH-01      |                                               |
| 1565 | D -> H |  | FAT | Bladder      | B104-0               |                                               |
| 1567 | A -> T |  | FAT | Esophagus    | ESO-859              |                                               |
| 1577 | A -> V |  | FAT | COSMIC       | COSMIC               | PMID: 17360675                                |
| 1590 | M -> I |  | FAT | Stomach      | TCGA-BR-4267-01      |                                               |
| 1592 | S -> Y |  | FAT | Uterus       | TCGA-BS-A0UV-01      |                                               |
| 1595 | M -> V |  | FAT | Liver        | TCGA-DD-A1EF-01      |                                               |
| 1600 | E -> A |  | FAT | Esophagus    | ESO-859              |                                               |
| 1612 | R -> P |  | FAT | Breast       | TCGA-BH-A0EE-01      |                                               |
| 1612 | R -> Q |  | FAT | CCLE         | C32_SKIN             |                                               |
| 1616 | R -> H |  | FAT | Colorectal   | TCGA-AA-3949-01      |                                               |
| 1616 | R -> C |  | FAT | Melanoma     | TCGA-FW-A3R5-06      |                                               |
| 1616 | R -> H |  | FAT | Stomach      | TCGA-HU-A4GX-01      |                                               |
| 1624 | Q -> R |  | FAT | Esophagus    | TCGA-D7-A6EY-01      |                                               |
| 1624 | Q -> H |  | FAT | Esophagus    | TCGA-L5-A4OI-01      |                                               |
| 1635 | K -> T |  | FAT | Uterus       | TCGA-B5-A11N-01      |                                               |
| 1640 | R -> L |  | FAT | Lung         | TCGA-66-2734-01      |                                               |
| 1640 | R -> W |  | FAT | Melanoma     | YUKLAB               |                                               |
| 1641 | S -> F |  | FAT | Melanoma     | TCGA-D3-A2JL-06      |                                               |
| 1641 | S -> F |  | FAT | Melanoma     | TCGA-DA-A1HV-06      |                                               |

|      |        |  |     |              |                        |                |
|------|--------|--|-----|--------------|------------------------|----------------|
| 1650 | M -> V |  | FAT | Liver        | H050566                |                |
| 1652 | T -> A |  | FAT | Kidney-ccRCC |                        | PMID: 25159823 |
| 1655 | K -> N |  | FAT | COSMIC       | COSMIC                 |                |
| 1662 | K -> M |  | FAT | Kidney-ccRCC | K251                   | PMID:22138691  |
| 1684 | Q -> P |  | FAT | Prostate     | PR-7520                |                |
| 1692 | V -> A |  | FAT | CCLE         | BICR18_UPPER_AER       |                |
| 1703 | N -> S |  | FAT | Pancreas     | TCGA-IB-7651-01        |                |
| 1705 | W -> R |  | FAT | COSMIC       | COSMIC                 |                |
| 1708 | A -> V |  | FAT | Uterus       | TCGA-N6-A4V9-01        |                |
| 1709 | R -> H |  | FAT | CCLE         | KYSE410_OESOPHA<br>GUS |                |
| 1709 | R -> H |  | FAT | Uterus       | TCGA-B5-A11E-01        |                |
| 1728 | A -> S |  | FAT | CCLE         | NCIH650_LUNG           |                |
| 1728 | A -> S |  | FAT | Lung         | TCGA-95-7039-01        |                |
| 1747 | M -> L |  | FAT | COSMIC       | COSMIC                 |                |
| 1749 | R -> Q |  | FAT | CCLE         | 22RV1_PROSTATE         |                |
| 1759 | L -> R |  | FAT | Breast       | TCGA-BH-A0AZ-01        |                |
| 1762 | Q -> H |  | FAT | COSMIC       | COSMIC                 |                |
| 1763 | G -> C |  | FAT | COSMIC       | COSMIC                 |                |
| 1765 | N -> D |  | FAT | CCLE         | HT_HAEMATOPOIETI       |                |
| 1769 | I -> V |  | FAT | Esophagus    | ESO-049                |                |
| 1778 | A -> S |  | FAT | Head & neck  | NPC30F                 |                |
| 1783 | D -> N |  | FAT | COSMIC       | COSMIC                 |                |
| 1784 | R -> H |  | FAT | Uterus       | TCGA-AP-A0LM-01        |                |
| 1792 | A -> V |  | FAT | Colorectal   | 587238                 |                |
| 1792 | A -> V |  | FAT | Colorectal   | TCGA-F4-6570-01        |                |
| 1799 | E -> K |  | FAT | Blood        | MM-0473                |                |
| 1799 | E -> K |  | FAT | Brain/CNS    | TCGA-19-1790-01        |                |
| 1799 | E -> K |  | FAT | CCLE         | HEC59_ENDOMETRIU<br>M  |                |
| 1799 | E -> K |  | FAT | CCLE         | HS683_CENTRAL_NE       |                |
| 1799 | E -> K |  | FAT | CCLE         | SNU349_KIDNEY          |                |
| 1799 | E -> K |  | FAT | Cervix       | TCGA-EX-A449-01        |                |
| 1799 | E -> K |  | FAT | Colorectal   | EV-075-P               |                |
| 1799 | E -> K |  | FAT | Colorectal   | TCGA-AA-3555-01        |                |
| 1799 | E -> K |  | FAT | Prostate     | PR-00-1165             |                |
| 1799 | E -> K |  | FAT | Uterus       | TCGA-AX-A0J0-01        |                |
| 1799 | E -> K |  | FAT | Uterus       | TCGA-D1-A17Q-01        |                |
| 1801 | V -> G |  | FAT | CCLE         | NCIH522_LUNG           |                |
| 1811 | R -> H |  | FAT | CCLE         | QGP1_PANCREAS          |                |
| 1818 | R -> C |  | FAT | Stomach      | TCGA-HU-A4GX-01        |                |
| 1822 | G -> V |  | FAT | CCLE         | SNGM_ENDOMETRIU<br>M   |                |

|      |        |         |     |               |                   |                                  |
|------|--------|---------|-----|---------------|-------------------|----------------------------------|
| 1832 | A -> T |         | FAT | COSMIC        | COSMIC            |                                  |
| 1836 | A -> T |         | FAT | CCLE          | IPC298_SKIN       |                                  |
| 1836 | A -> T |         | FAT | CCLE          | RERFLCAD1_LUNG    |                                  |
| 1837 | T -> N |         | FAT | CCLE          | NCIH522_LUNG      |                                  |
| 1844 | T -> A |         | FAT | Colorectal    | 587332            |                                  |
| 1845 | E -> K |         | FAT | Bladder       | DS-bla-044        |                                  |
| 1845 | E -> K |         | FAT | Bladder       | TCGA-LT-A5Z6-01   |                                  |
| 1845 | E -> K |         | FAT | Breast        | Novartis          |                                  |
| 1856 | T -> I |         | FAT | Melanoma      | TCGA-D3-A51H-06   |                                  |
| 1857 | E -> K |         | FAT | Liver         | Novartis          |                                  |
| 1857 | E -> K |         | FAT | Melanoma      | TCGA-EE-A3AG-06   |                                  |
| 1866 | Q -> R |         | FAT | COSMIC        | COSMIC            |                                  |
| 1888 | F -> I |         | FAT | Kidney-ccRCC  | TCGA-B0-4846-01   | Current study,<br>PMID: 24631838 |
| 1888 | F -> L |         | FAT | Kidney-ccRCC  | TCGA-CZ-4857-01   | Current study,<br>PMID: 24631838 |
| 1888 | F -> L |         | FAT | Kidney-ccRCC  | TCGA-CZ-4866-01   | Current study,<br>PMID: 24631838 |
| 1888 | F -> V |         | FAT | Uterus        | TCGA-BS-A0TC-01   | Current study,<br>PMID: 24631838 |
| 1888 | F -> L |         | FAT | Uterus        | TCGA-D1-A16X-01   | Current study,<br>PMID: 24631838 |
| 1890 | R -> C |         | FAT | Colorectal    | TCGA-AA-3663-01   |                                  |
| 1890 | R -> C |         | FAT | Melanoma      | MEL-JWCI-WGS-1    |                                  |
| 1890 | R -> C |         | FAT | Melanoma      | TCGA-FW-A3R5-06   |                                  |
| 1894 | L -> V |         | FAT | CCLE          | SNU81_LARGE_INTE  |                                  |
| 1899 | N -> D |         | FAT | Colorectal    | 587332            |                                  |
| 1903 | T -> I |         | FAT | CCLE          | ISHIKAWAHERAKLIO  |                                  |
| 1905 | R -> S |         | FAT | Breast        | Novartis          |                                  |
| 1907 | L -> F |         | FAT | Colorectal    | TCGA-AG-A002-01   |                                  |
| 1912 | D -> H | 5734G>C | FAT | Kidney-ccRCC  | Novartis RECORD-3 |                                  |
| 1914 | G -> C |         | FAT | COSMIC        | COSMIC            |                                  |
| 1921 | E -> V |         | FAT | CCLE          | CORL23_LUNG       |                                  |
| 1948 | T -> M |         | FAT | CCLE          | GP2D_LARGE_INTES  |                                  |
| 1950 | R -> K |         | FAT | Melanoma      | YUKIL             |                                  |
| 1953 | V -> L |         | FAT | COSMIC        | COSMIC            |                                  |
| 1966 | R -> Q |         | FAT | Uterus        | TCGA-D1-A167-01   |                                  |
| 1970 | Q -> E |         | FAT | Kidney-nccRCC | 9267011           |                                  |
| 1971 | A -> T |         | FAT | Bladder       | DS-bla-024        |                                  |
| 1971 | A -> T |         | FAT | Blood         | CLL099            |                                  |
| 1971 | A -> T |         | FAT | Brain/CNS     | TCGA-28-2502-01   |                                  |



|      |        |         |               |               |                    |                                               |
|------|--------|---------|---------------|---------------|--------------------|-----------------------------------------------|
| 1971 | A -> T | 5911G>A | FAT           | Kidney-ccRCC  | Novartis RECORD-3  |                                               |
| 1971 | A -> S |         | FAT           | Liver         | H072999            |                                               |
| 1973 | I -> F |         | FAT           | Breast        | TCGA-E2-A15O-01    | PMID: 24631838,<br>17360675                   |
| 1973 | I -> F |         | FAT           | Kidney-ccRCC  | TCGA-B0-5100-01    | Current Study,<br>PMID: 24631838,<br>17360675 |
| 1974 | Y -> H |         | FAT           | Breast        | Novartis           |                                               |
| 1974 | Y -> H |         | FAT           | CCLE          | KMRC2_KIDNEY       |                                               |
| 1974 | Y -> C |         | FAT           | Uterus        | TCGA-D1-A1NU-01    |                                               |
| 1977 | T -> S |         | FAT           | Blood         | CLL005             | PMID: 24631838                                |
| 1977 | T -> K |         | FAT           | Kidney-ccRCC  | TCGA-B0-4827-01    | PMID: 24631838                                |
| 1977 | T -> K |         | FAT           | Lymph         | SU-DHL-9           | PMID: 24631838                                |
| 1977 | T -> R |         | FAT           | Prostate      | TCGA-CH-5768-01    | PMID: 24631838                                |
| 1977 | T -> K | 5930C>A | FAT           | Kidney-ccRCC  | Novartis RECORD-3  |                                               |
| 1981 | K -> E |         | FAT           | Breast        | BR-V-049           |                                               |
| 1981 | K -> E |         | FAT           | CCLE          | MFE319_ENDOMETRIUM |                                               |
| 1986 | A -> T |         | FAT           | CCLE          | TEN_ENDOMETRIUM    |                                               |
| 1987 | R -> W |         | FAT           | Stomach       | TCGA-D7-A4Z0-01    |                                               |
| 1998 | M -> I |         | FAT           | COSMIC        | COSMIC             |                                               |
| 2006 | V -> L |         | Kinase N lobe | CCLE          | TUHR10TKB_KIDNEY   | Current Study,<br>PMID: 24631838              |
| 2006 | V -> F |         | Kinase N lobe | Kidney-ccRCC  | K104               | PMID: 24631838                                |
| 2006 | V -> L |         | Kinase N lobe | Kidney-ccRCC  | TCGA-CJ-4644-01    | Current Study,<br>PMID: 24631838              |
| 2006 | V -> I |         | Kinase N lobe | Uterus        | TCGA-B5-A11H-01    | PMID: 24631838                                |
| 2011 | M -> V |         | Kinase N lobe | COSMIC        | COSMIC             | PMID: 20190810                                |
| 2011 | M -> I |         | Kinase N lobe | COSMIC        | COSMIC             |                                               |
| 2013 | S -> G |         | Kinase N lobe | Uterus        | TCGA-BG-A0MO-01    |                                               |
| 2014 | E -> K |         | Kinase N lobe | CCLE          | UBLC1_URINARY_TR   | PMID: 24625776                                |
| 2016 | L -> R |         | Kinase N lobe | CCLE          | SNU738_CENTRAL_N   |                                               |
| 2017 | I -> T |         | Kinase N lobe | CCLE          | BL41_HAEMATOPOIE   | PMID: 18812319                                |
| 2017 | I -> T |         | Kinase N lobe | Kidney-nccRCC | TCGA-KM-8441-01    | PMID: 18812319                                |
| 2022 | L -> P |         | FRB           | COSMIC        | COSMIC             |                                               |
| 2023 | W -> G |         | FRB           | Lung          | TCGA-66-2787-01    |                                               |
| 2030 | G -> V |         | FRB           | CCLE          | BCP1_HAEMATOPOIE   |                                               |
| 2032 | E -> K |         | FRB           | Esophagus     | TCGA-L5-A88W-01    |                                               |

|      |        |         |               |              |                   |                |
|------|--------|---------|---------------|--------------|-------------------|----------------|
| 2033 | E -> V |         | FRB           | Kidney-ccRCC | TCGA-B0-4852-01   |                |
| 2040 | G -> E |         | FRB           | Stomach      | Novartis          |                |
| 2047 | M -> V |         | FRB           | COSMIC       | COSMIC            |                |
| 2056 | A -> V |         | FRB           | Uterus       | TCGA-B5-A11E-01   |                |
| 2066 | K -> R |         | FRB           | Liver        | H072999           |                |
| 2077 | D -> E |         | FRB           | Melanoma     | TCGA-EE-A2GC-06   |                |
| 2088 | Y -> D |         | FRB           | Uterus       | TCGA-AX-A0J0-01   |                |
| 2100 | A -> T |         | FRB           | Lung         | 2334201           | PMID: 24631838 |
| 2101 | W -> L |         | FRB           | Breast       | TCGA-D8-A1Y0-01   |                |
| 2106 | H -> P | 6317A>C | FRB           | Kidney-ccRCC | Novartis RECORD-3 |                |
| 2106 | H -> Y |         | FRB           | COSMIC       | COSMIC            |                |
| 2108 | F -> L |         | FRB           | Thyroid      |                   | PMID: 25295501 |
| 2125 | Y -> C |         | Kinase N lobe | Liver        | H090285           |                |
| 2127 | S -> F |         | Kinase N lobe | Colorectal   | EV-061-P          |                |
| 2134 | R -> P |         | Kinase N lobe | Breast       | COSMIC            |                |
| 2134 | R -> W |         | Kinase N lobe | COSMIC       | COSMIC            |                |
| 2134 | R -> L |         | Kinase N lobe | Lung         | TCGA-66-2754-01   | PMID: 24631838 |
| 2141 | P -> L |         | Kinase N lobe | Breast       | Novartis          |                |
| 2150 | I -> V |         | Kinase N lobe | COSMIC       | COSMIC            |                |
| 2152 | R -> C |         | Kinase N lobe | CCLE         | A375_SKIN         | PMID: 24631838 |
| 2152 | R -> C |         | Kinase N lobe | Melanoma     | TCGA-FW-A3R5-06   | PMID: 24631838 |
| 2154 | Q -> E |         | Kinase N lobe | COSMIC       | COSMIC            |                |
| 2155 | S -> F |         | Kinase N lobe | Melanoma     | TCGA-GF-A6C9-06   |                |
| 2172 | L -> M |         | Kinase N lobe | Head & neck  | TCGA-DQ-7588-01   | PMID: 24631838 |
| 2179 | G -> E |         | Kinase N lobe | Melanoma     | MEL-Ma-Mel-35     |                |
| 2186 | L -> V |         | Kinase N lobe | Cervix       | TCGA-JW-A5VL-01   |                |
| 2191 | D -> H |         | Kinase N lobe | Cervix       | TCGA-C5-A1BM-01   | PMID: 24631838 |
| 2193 | R -> C |         | Kinase N lobe | Stomach      | TCGA-BR-4370-01   | PMID: 24631838 |
| 2197 | R -> C |         | Kinase N lobe | Esophagus    | TCGA-XP-A8T6-01   |                |
| 2198 | H -> P |         | Kinase N lobe | Kidney-nRCC  | Novartis RECORD-3 |                |
| 2206 | N -> S |         | Kinase N lobe | COSMIC       | COSMIC            | PMID: 24631838 |

|      |        |         |               |               |                    |                                         |
|------|--------|---------|---------------|---------------|--------------------|-----------------------------------------|
| 2207 | T -> I |         | Kinase N lobe | Melanoma      | TCGA-EB-A5UN-06    |                                         |
| 2209 | L -> V |         | Kinase N lobe | Bladder       | TCGA-BT-A0YX-01    | PMID: 24631838                          |
| 2209 | L -> V | 6625C>G | Kinase N lobe | Kidney-ccRCC  | Novartis RECORD-3  |                                         |
| 2210 | A -> P |         | Kinase N lobe | Kidney-ccRCC  | TCGA-B0-4810-01    | PMID: 24631838                          |
| 2210 | A -> P | 6628G>C | Kinase N lobe | Kidney-ccRCC  | Novartis RECORD-3  |                                         |
| 2215 | S -> F |         | Kinase N lobe | Brain/CNS     | P01_Rec            | Current Study, PMID: 24631838, 24336570 |
| 2215 | S -> T |         | Kinase N lobe | Brain/CNS     | TCGA-06-1802-01    | PMID: 24631838                          |
| 2215 | S -> Y |         | Kinase N lobe | CCLE          | JHUEM7_ENDOMETRIUM | PMID: 24631838, 20190810                |
| 2215 | S -> Y |         | Kinase N lobe | Cervix        | TCGA-FU-A3HZ-01    | PMID: 24631838, 20190810                |
| 2215 | S -> F |         | Kinase N lobe | Cervix        | TCGA-JW-A5VL-01    | Current Study, PMID: 24631838, 24336570 |
| 2215 | S -> Y |         | Kinase N lobe | Colorectal    | TCGA-A6-6141-01    | PMID: 24631838, 20190810                |
| 2215 | S -> Y |         | Kinase N lobe | Colorectal    | TCGA-AA-A00K-01    | PMID: 24631838, 20190810                |
| 2215 | S -> F |         | Kinase N lobe | Colorectal    | TCGA-DM-A1D4-01    | Current Study, PMID: 24631838, 24336570 |
| 2215 | S -> F |         | Kinase N lobe | Colorectal    | TCGA-F4-6806-01    | Current Study, PMID: 24631838, 24336570 |
| 2215 | S -> P |         | Kinase N lobe | COSMIC        | COSMIC             | PMID: 24631838                          |
| 2215 | S -> F |         | Kinase N lobe | Kidney-ccRCC  | TCGA-CJ-5679-01    | Current Study, PMID: 24631838, 24336570 |
| 2215 | S -> F | 6644C>T | Kinase N lobe | Kidney-ccRCC  | Novartis RECORD-3  |                                         |
| 2215 | S -> Y | 6644C>A | Kinase N lobe | Kidney-ccRCC  | Novartis RECORD-3  |                                         |
| 2215 | S -> Y |         | Kinase N lobe | Kidney-nccRCC | 9266804            | PMID: 24631838, 20190810                |
| 2215 | S -> Y |         | Kinase N lobe | Kidney-nccRCC | TCGA-A4-7828-01    | PMID: 24631838, 20190810                |
| 2215 | S -> F |         | Kinase N lobe | Melanoma      | MEL-UKRV-Mel-20    | Current Study, PMID: 24631838, 24336570 |
| 2215 | S -> F |         | Kinase N lobe | Melanoma      | YULAN              | Current Study, PMID: 24631838, 24336570 |
| 2215 | S -> Y |         | Kinase N lobe | Uterus        | TCGA-BG-A0VX-01    | PMID: 24631838, 20190810                |
| 2215 | S -> Y |         | Kinase N lobe | Uterus        | TCGA-BS-A0UF-01    | PMID: 24631838, 20190810                |

|      |        |         |               |              |                    |                                         |
|------|--------|---------|---------------|--------------|--------------------|-----------------------------------------|
| 2215 | S -> Y |         | Kinase N lobe | Uterus       | TCGA-BS-A0UV-01    | PMID: 24631838, 20190810                |
| 2216 | L -> P |         | Kinase N lobe | Brain/CNS    | TCGA-CS-5396-01    | PMID: 24631838                          |
| 2217 | R -> W |         | Kinase N lobe | CCLE         | HEC251_ENDOMETRIUM | PMID: 24631838                          |
| 2220 | L -> F |         | Kinase N lobe | Kidney-ccRCC |                    | Current study, PMID: 24631838           |
| 2223 | Q -> K |         | Kinase N lobe | Colorectal   | TCGA-A6-4105-01    | Current study                           |
| 2223 | Q -> K |         | Kinase N lobe | Kidney-ccRCC |                    | Current study, PMID: 24631838, 24622468 |
| 2225 | Y -> C |         | Kinase N lobe | Esophagus    | TCGA-VQ-A8PE-01    |                                         |
| 2226 | A -> S |         | Kinase N lobe |              |                    | PMID: 24631838                          |
| 2228 | I -> T |         | Kinase N lobe | Kidney-ccRCC | TCGA-B0-5098       | Current study, PMID: 24631838           |
| 2230 | L -> V |         | Kinase N lobe | Kidney-ccRCC | TCGA-CJ-4887-01    | Current study, PMID: 24631838           |
| 2231 | S -> W |         | Kinase N lobe | CCLE         | SNU1196_BILIARY_   | PMID: 24631838                          |
| 2232 | T -> I |         | Kinase N lobe | CCLE         | KMH2_HAEMATOPOI E  | PMID: 24631838                          |
| 2238 | G -> D |         | Kinase N lobe | CCLE         | CW2_LARGE_INTEST   | PMID: 24631838                          |
| 2239 | W -> C |         | Kinase N lobe | Cervix       | TCGA-JW-A5VL-01    |                                         |
| 2240 | V -> G |         | Kinase N lobe | COSMIC       | COSMIC             |                                         |
| 2241 | P -> S |         | Kinase C lobe | Bladder      | DS-bla-084         |                                         |
| 2241 | P -> S |         | Kinase C lobe | Bladder      | TCGA-DK-A6B6-01    |                                         |
| 2241 | P -> S |         | Kinase C lobe | Cervix       | TCGA-JW-A5VL-01    |                                         |
| 2241 | P -> H | 6722C>A | Kinase C lobe | Kidney-ccRCC | Novartis RECORD-3  |                                         |
| 2251 | R -> Q |         | Kinase C lobe | Lung         | TCGA-97-7554-01    |                                         |
| 2254 | R -> M |         | Kinase C lobe | CCLE         | HEC1A_ENDOMETRIUM  |                                         |
| 2260 | L -> H |         | Kinase C lobe | Head & neck  | HN_62421           |                                         |
| 2265 | H -> P |         | Kinase C lobe | CCLE         | SNU520_STOMACH     |                                         |
| 2266 | R -> P |         | Kinase C lobe | Lung         | TCGA-75-5126-01    |                                         |
| 2268 | M -> V |         | Kinase C lobe | COSMIC       | COSMIC             |                                         |
| 2272 | A -> S |         | Kinase C lobe | Lung         | TCGA-34-5239-01    |                                         |

|      |        |         |               |              |                    |                                          |
|------|--------|---------|---------------|--------------|--------------------|------------------------------------------|
| 2272 | A -> V |         | Kinase C lobe | Melanoma     | TCGA-EB-A3Y7-01    |                                          |
| 2294 | T -> A |         | Kinase C lobe | Stomach      | TCGA-BR-8363-01    |                                          |
| 2311 | E -> K |         | Kinase C lobe | Bladder      | DS-bla-037         |                                          |
| 2327 | M -> I |         | Kinase C lobe | Brain/CNS    | TCGA-DU-6393-01    | Current study                            |
| 2327 | M -> I |         | Kinase C lobe | Kidney-ccRCC | TCGA-A3-3347-01    | Current study                            |
| 2333 | I -> M |         | Kinase C lobe | Colorectal   | TCGA-AA-3666-01    |                                          |
| 2334 | L -> V |         | Kinase C lobe | Kidney-ccRCC | TCGA-B0-5691-01    | PMID: 24631838                           |
| 2338 | D -> N |         | Kinase C lobe | Esophagus    | TCGA-2H-A9GR-01    |                                          |
| 2340 | H -> R |         | Kinase C lobe | CCLE         | L540_HAEMATOPOIE   |                                          |
| 2345 | M -> V |         | Kinase C lobe | CCLE         | NCIH446_LUNG       |                                          |
| 2351 | G -> E |         | Kinase C lobe | Esophagus    | ESCC-148T          |                                          |
| 2355 | H -> R |         | Kinase C lobe | Lung         | LUAD-FH5PJ         |                                          |
| 2368 | R -> Q |         | Kinase C lobe | CCLE         | HEC108_ENDOMETRIUM |                                          |
| 2369 | E -> K |         | Kinase C lobe | COSMIC       |                    |                                          |
| 2388 | E -> Q |         | Kinase C lobe | Breast       | TCGA-BH-A0HP-01    |                                          |
| 2400 | C -> Y |         | Kinase C lobe | Lung         | 585223             |                                          |
| 2406 | V -> M |         | Kinase C lobe | COSMIC       | COSMIC             |                                          |
| 2406 | V -> A |         | Kinase C lobe | Kidney-ccRCC |                    | Current study<br>PMID:21248752           |
| 2412 | D -> H |         | Kinase C lobe | COSMIC       | COSMIC             |                                          |
| 2412 | D -> V |         | Kinase C lobe | Liver        | H061142            |                                          |
| 2413 | S -> I | 7238G>T | Kinase C lobe | Kidney-ccRCC | Novartis RECORD-3  |                                          |
| 2414 | V -> I |         | Kinase C lobe | Lymph        | OCI-Ly1            |                                          |
| 2416 | A -> V |         | Kinase C lobe | COSMIC       | COSMIC             |                                          |
| 2417 | V -> M |         | Kinase C lobe | Colorectal   | 587338             |                                          |
| 2417 | V -> M |         | Kinase C lobe | Kidney-ccRCC | K31                |                                          |
| 2419 | E -> K |         | Kinase C lobe | Cervix       | TCGA-EK-A3GK-01    | PMID: 24631838,<br>24625776,<br>17360675 |

|      |        |         |               |               |                   |                                         |
|------|--------|---------|---------------|---------------|-------------------|-----------------------------------------|
| 2419 | E -> K | 7255G>A | Kinase C lobe | Kidney-ccRCC  | Novartis RECORD-3 |                                         |
| 2420 | A -> P |         | Kinase C lobe | Blood         | CLL147            |                                         |
| 2420 | A -> V |         | Kinase C lobe | Melanoma      | TCGA-FS-A4FC-06   |                                         |
| 2422 | V -> I |         | Kinase C lobe | COSMIC        | COSMIC            |                                         |
| 2424 | D -> H |         | Kinase C lobe | COSMIC        | COSMIC            |                                         |
| 2424 | D -> N |         | Kinase C lobe | Melanoma      | TCGA-ER-A42L-06   |                                         |
| 2427 | L -> Q |         | Kinase C lobe | Brain/CNS     | TCGA-06-0122-01   |                                         |
| 2427 | L -> R |         | Kinase C lobe | CCLE          | ST486_HAEMATOPOI  |                                         |
| 2427 | L -> P |         | Kinase C lobe | Kidney-ccRCC  |                   | PMID: 25159823                          |
| 2427 | L -> Q | 7280T>A | Kinase C lobe | Kidney-ccRCC  | Novartis RECORD-3 |                                         |
| 2427 | L -> Q |         | Kinase C lobe | Kidney-nccRCC | 9266792           |                                         |
| 2427 | L -> R |         | Kinase C lobe | Kidney-nccRCC | TCGA-KN-8437-01   |                                         |
| 2430 | R -> M |         | Kinase C lobe | CCLE          | MOLT16_HAEMATOP O | PMID: 24631838                          |
| 2431 | L -> P |         | Kinase C lobe | Kidney-ccRCC  |                   | Current study, PMID: 24631838, 22397650 |
| 2441 | R -> Q |         | Kinase C lobe | Colorectal    | TCGA-G4-6322-01   |                                         |
| 2457 | I -> M |         | Kinase C lobe | Colorectal    | 587376            |                                         |
| 2458 | L -> V |         | Kinase C lobe | Breast        | Novartis          |                                         |
| 2476 | P -> L |         | Kinase C lobe | COSMIC        | COSMIC            | PMID: 20190810                          |
| 2488 | V -> G |         | Kinase C lobe | Eye           | TCGA-RZ-AB0B-01   |                                         |
| 2490 | P -> A |         | Kinase C lobe | CCLE          | L1236_HAEMATOPOI  |                                         |
| 2500 | I -> F |         | Kinase C lobe | Brain/CNS     | TCGA-QR-A6GX-01   | PMID: 24631838                          |
| 2500 | I -> N |         | Kinase C lobe | Breast        | Novartis          |                                         |
| 2500 | I -> F |         | Kinase C lobe | Breast        | TCGA-A8-A06Y-01   | PMID: 24631838                          |
| 2500 | I -> F |         | Kinase C lobe | CCLE          | JHOM2B_OVARY      | PMID: 24631838                          |
| 2500 | I -> M |         | Kinase C lobe | Kidney-ccRCC  | TCGA-CW-5580-01   | PMID: 24631838                          |
| 2500 | I -> M |         | Kinase C lobe | NCI60         | HCC_2998          | PMID: 24631838                          |

|      |        |         |               |              |                   |                                         |
|------|--------|---------|---------------|--------------|-------------------|-----------------------------------------|
| 2500 | I -> M |         | Kinase C lobe | Stomach      | TCGA-BR-8680-01   | PMID: 24631838                          |
| 2500 | I -> M |         | Kinase C lobe | Uterus       | TCGA-B5-A0JY-01   | PMID: 24631838                          |
| 2501 | I -> F |         | Kinase C lobe | Eye          | TCGA-RZ-AB0B-01   | PMID: 17360675                          |
| 2501 | I -> F | 7501A>T | Kinase C lobe | Kidney-ccRCC | Novartis RECORD-3 |                                         |
| 2501 | I -> F |         | Kinase C lobe | Liver        | TCGA-DD-A11A-01   | PMID: 17360675                          |
| 2505 | R -> Q |         | Kinase C lobe | COSMIC       | COSMIC            | PMID: 24631838                          |
| 2505 | R -> L |         | Kinase C lobe | COSMIC       | COSMIC            |                                         |
| 2505 | R -> P |         | Kinase C lobe | Kidney-ccRCC |                   | Current study, PMID: 24631838, 20190810 |
| 2509 | T -> A |         | Kinase C lobe | CCLE         | COLO684_ENDOMET R |                                         |
| 2509 | T -> A |         | Kinase C lobe | CCLE         | COLO704_OVARY     |                                         |
| 2511 | R -> Q |         | Kinase C lobe | Bladder      | B16               | PMID: 24631838                          |
| 2512 | D -> H |         | Kinase C lobe | COSMIC       | COSMIC            | PMID: 24631838                          |
| 2512 | D -> Y |         | Kinase C lobe | Uterus       | TCGA-AP-A0LL-01   | PMID: 24631838                          |
| 2512 | D -> G |         | Kinase C lobe | Uterus       | TCGA-AX-A0J1-01   | PMID: 24631838                          |
| 2523 | T -> M |         | Kinase C lobe | Uterus       | TCGA-D1-A167-01   |                                         |
| 2524 | Q -> L |         | Kinase C lobe | COSMIC       | COSMIC            |                                         |
| 2526 | E -> K |         | Kinase C lobe | Cervix       | TCGA-IR-A3LL-01   |                                         |
| 2532 | A -> V |         | Kinase C lobe | Stomach      | TCGA-BR-4292-01   |                                         |

\* For Novartis RECORD-3 data

**Supplementary Table 2.** Summary of phenotypes of WT mTOR and selected mTOR mutants characterized in current study.

| mTOR                                    | WT        | A1105P | L1460P              | C1483F              | F1888L              | T1977K              | S2215F              | L2230V              | M2327I    | R2505P    |
|-----------------------------------------|-----------|--------|---------------------|---------------------|---------------------|---------------------|---------------------|---------------------|-----------|-----------|
| PRAS40 overexpression                   | Sensitive | N/A    | Sensitive           | Sensitive           | Sensitive           | Sensitive           | Sensitive           | Sensitive           | Sensitive | Sensitive |
| RHEB knockdown                          | Sensitive | N/A    | Sensitive           | Sensitive           | Sensitive           | Sensitive           | Sensitive           | Sensitive           | Sensitive | N/A       |
| Rag mutant overexpression               | Sensitive | N/A    | Sensitive           | Sensitive           | Sensitive           | Sensitive           | Sensitive           | Sensitive           | Sensitive | Sensitive |
| Serum deprivation                       | Sensitive | N/A    | Partially Resistant | N/A       | N/A       |
| Glucose deprivation                     | Sensitive | N/A    | Partially Resistant | N/A       | N/A       |
| Amino acid deprivation                  | Sensitive | N/A    | Sensitive           | Sensitive           | Sensitive           | Sensitive           | Sensitive           | Sensitive           | N/A       | N/A       |
| FKBP38 knockdown                        | No effect | N/A    | No effect           | No effect | No effect |
| FKBP38 overexpression                   | No effect | N/A    | No effect           | No effect | No effect |
| Binding with DEPTOR                     | Normal    | N/A    | Reduced             | Reduced             | Normal              | Normal              | Normal              | Normal              | Normal    | Reduced   |
| DEPTOR overexpression                   | Sensitive | N/A    | Sensitive           | Sensitive           | Resistant           | Resistant           | Resistant           | Resistant           | Resistant | Resistant |
| Vmax                                    | Normal    | N/A    | N/A                 | N/A                 | N/A                 | N/A                 | Increased           | Increased           | N/A       | N/A       |
| Km                                      | Normal    | N/A    | N/A                 | N/A                 | N/A                 | N/A                 | Reduced             | Normal              | N/A       | N/A       |
| RAPTOR overexpression                   | Sensitive | N/A    | Resistant           | Resistant           | Sensitive           | Resistant           | Resistant           | Sensitive           | Sensitive | Sensitive |
| REDD1 overexpression                    | Sensitive | N/A    | Resistant           | Resistant           | Sensitive           | Resistant           | Resistant           | Resistant           | Resistant | Resistant |
| Rapamycin 10 nM                         | Sensitive | N/A    | N/A                 | Sensitive           | Sensitive           | Sensitive           | Sensitive           | Sensitive           | N/A       | N/A       |
| Rapamycin 2.5 nM                        | Sensitive | N/A    | N/A                 | Sensitive           | Sensitive           | Sensitive           | Sensitive           | Sensitive           | N/A       | N/A       |
| Tumor growth using Vhl-silenced NIH/3T3 | No        | No     | N/A                 | Yes                 | Yes                 | Yes                 | Yes                 | Yes                 | N/A       | Yes       |



**Supplementary Table 2 (continue).** Summary of phenotypes of WT mTOR and selected mTOR mutants characterized in current study.

| mTOR                         | C1483F/<br>T1977K      | C1483F/<br>S2215F      | T1977K/<br>S2215F      | F1888L/<br>L2230V      |
|------------------------------|------------------------|------------------------|------------------------|------------------------|
| PRAS40<br>overexpression     | Sensitive              | Sensitive              | Sensitive              | Sensitive              |
| RHEB knockdown               | Resistant              | Resistant              | Resistant              | Resistant              |
| Rag mutant<br>overexpression | Resistant              | Resistant              | Resistant              | Resistant              |
| Serum<br>deprivation         | Resistant              | Resistant              | Resistant              | Resistant              |
| Glucose<br>deprivation       | Resistant              | Resistant              | Resistant              | Resistant              |
| Amino acid<br>deprivation    | Partially<br>resistant | Partially<br>resistant | Partially<br>resistant | Partially<br>resistant |
| Rapamycin 10 nM              | N/A                    | Sensitive              | N/A                    | Sensitive              |
| Rapamycin 2.5 nM             | N/A                    | Partially<br>resistant | N/A                    | Partially<br>resistant |

**Supplementary Table 3.** List of primers used for site-directed mutagenesis

|             |                                                        |
|-------------|--------------------------------------------------------|
| mTOR K860N  | 5'-GAG CCC TAC AGG AAT TAC CCT ACT TTG C-3'            |
| mTOR E919V  | 5'-GTC AGC CTG TCA GTA TCC AAG TCA AGT C-3'            |
| mTOR A1105P | 5'-CCA GCT GTT TGG CCC CAA CCT GGA TGA C-3'            |
| mTOR L1443S | 5'-GCG GCC GGA GTG TCA GAA TAT GCC ATG AAA C-3'        |
| mTOR A1459P | 5'-CAC GAG TGG GAG GAT CCC CTT GTG GCC TAT G-3'        |
| mTOR L1460P | 5'-GTG GGA GGA TGC CCC TGT GGC CTA TGA CAA G-3'        |
| mTOR C1483F | 5'-GGG CCG CAT GCG CTT CCT CGA GGC CTT GGG-3'          |
| mTOR F1888L | 5'-GCC GTC CAG GGC TTG TTC CGT TCC ATC TCC-4'          |
| mTOR F1888I | 5'-CTG CCG TCC AGG GCA TCT TCC GTT CCA TCT C-3'        |
| mTOR F1888V | 5'-CTG CCG TCC AGG GCG TCT TCC GTT CCA TCT C-3'        |
| mTOR I1973F | 5'-CCC CCA GGC CCT CTT CTA CCC ACT GAC AG-3'           |
| mTOR T1977K | 5'-CAT CTA CCC ACT GAA AGT GGC TTC TAA GTC-3'          |
| mTOR V2006L | 5'-CAC AGC AAC ACC CTG CTC CAG CAG GCC ATG-3'          |
| mTOR S2215F | 5'-CCA ATG ACC CAA CAT TTC TTC GGA AAA ACC-3'          |
| mTOR L2220F | 5' CAT CTC TTC GGA AAA ACT TCA GCA TCC AGA G-3'        |
| mTOR Q2223K | 5'-GGA AAA ACC TCA GCA TCA AGA GAT ACG CTG TC-3'       |
| mTOR I2228T | 5'-GAG ATA CGC TGT CAC CCC TTT ATC GAC C-3'            |
| mTOR L2230V | 5'-CGC TGT CAT CCC TGT ATC GAC CAA CTC GG-3'           |
| mTOR M2327I | 5'-GTT CTT TAG CGG TCA TAT CAA TGG TTG GG-3'           |
| mTOR V2406A | 5'-CAC AGT GAT GGA GGC GCT GCG AGA GCA C-3'            |
| mTOR L2431P | 5'-GCT GAA CTG GAG GCC GAT GGA CAC AAA TAC C-3'        |
| mTOR R2505P | 5'-GAT TAT TAA CAG GGT TCC AGA TAA GCT CAC TGG-3'      |
| Akt1 E17K   | 5'-GGC TGC ACA AAC GAG GGA AAT ATA TTA AAA CCT GGC -3' |

## SUPPLEMENTARY METHODS

### ***Plasmid Construction, shRNA, siRNA, antibodies***

pcDNA3-Flag-mTOR was a gift from Jie Chen (Addgene plasmid # 26603). The following plasmids were gifts from David Sabatini: pRK5-HA-RAPTOR (Addgene plasmid # 8513), pRK5-HA-PRAS40 (Addgene plasmid # 15481), pRK5-HA-GST-RAGB (Addgene plasmid # 19301), pRK5-HA-GST-RAGD (Addgene plasmid # 19307), pRK5-HA-GST-RAGB<sup>GDP</sup> (Addgene plasmid # 19302), pRK5-HA-GST-RAGD<sup>GTP</sup> (Addgene plasmid # 19309), and pRK5-HA-GST-RHEB (Addgene plasmid # 14951), pRK5-HA-GST-Presc-mAkt1 (Addgene plasmid # 48805), non-degradable pRK5-Flag-DEPTOR (13xS/T->A) (Addgene plasmid #21702), HA-GST-tagged S6K1 (pRK5-HA-GST-S6K1). HA-tagged 4EBP1 (pcDNA3-HA-4EBP1) was constructed by inserting a BamHI-Sall fragment containing HA-4EBP1 from pBABE-HA-4EBP1 (1) into the BamHI-XhoI sites of pcDNA3. HA-GST tagged GFP (pRK5-HA-GST-GFP) was constructed by swapping a NotI-Sall fragment containing GFP from pEGFP-N3 (Clontech) with that of RHEB from pRK5-HA-GST-RHEB. HA-tagged REDD1 (pcDNA3-HA-REDD1) was constructed by amplifying the REDD1 gene from a human cDNA library and cloned into the BglII and XhoI sites of pcDNA3-HA. pLenti-REDD1 was constructed by inserting a BglII-XhoI fragment containing REDD1 from pcDNA3-HA-REDD1 into the BamHI-XhoI sites of pLenti-CMV-Blast empty(Addgene plasmid #17486, a gift from Eric Campeau). HA-tagged FKBP38 (pcDNA3-HA-FKBP38) was constructed by amplifying the FKBP38 gene from a mouse cDNA library and cloned into the BglII and XhoI sites of pcDNA3-HA.

Lentiviral shRNA constructs pLKO.1-shRHEB1 (Target sequence: 5'-CCTCAGACATACTCCATAGAT-3') was a gift from Kun-Liang Guan (Addgene plasmid # 26625). Lentiviral shRNA constructs pLKO.1-shmVhl (Target Sequence: 5'-TCTCAGGTCATCTTCTGCAAT-3') was obtained from Sigma (TRCN0000009735). Lentiviral shRNA constructs pLKO.1-shmVhl(2) (Target Sequence: 5' GTTAACCAAACGGAGCTGTTT-3')

was obtained from Sigma (TRCN0000009737). Lentiviral shRNA constructs pLKO.1-shMTOR (Target Sequence: 5' GCTGCTGTTGAAGAATATATT-3') was obtained from Sigma (TRCN0000039783) Inducible lentiviral shRNA construct Tet-pLKO-puro-shFKBP38 was constructed by inserting the annealed oligos (5'-CCGGTGAAGGTGAAGTGTCTGAACACTCGAGTGTTTCAGACACTTCACCTTCATTTTTG -3' and 5'-AATTCAAAAATGAAGGTGAAGTGTCTGAACACTCGAGTGTTTCAGACACTTCACCTTCA-3') into the EcoRI and AgeI sites of Tet-pLKO-puro (a gift from Dmitri Wiederschain, Addgene plasmid # 21915).

siGenome SMARTpool siRNA targeting mouse Redd1 (Target Sequence: 5' GUGCCCACCUUUCAGUUGA-3', 5' GCUAAGUACCGGCUUCAGA-3', 5' GCUGUUAAGUUCUGCCAAC-3', 5' GAUCGUUUCUCGUCCUCCU-3') was obtained from Dharmacon (M-056656). The scramble siRNA oligonucleotides were purchased from Dharmacon (D-001206-13-20);

Antibodies used for immunoblot analysis are as follows: anti-pThr-389 S6K (no. 9205, Cell Signaling Technology), anti-S6K (no. 9202, Cell Signaling Technology), anti-pSer-65 4EBP1 (no. 9451, Cell Signaling Technology), anti-4EBP1 (no. 9452, Cell Signaling Technology), anti-pSer-473 AKT1 (no. 9271, Cell Signaling Technology), anti-AKT1 (no. 9272, Cell Signaling Technology), anti-pSer 235/236 S6 (no. 4858, Cell Signaling Technology), anti-S6 (no. 2217, Cell Signaling Technology), anti-pSer 939 TSC2 (no. 3615, Cell Signaling Technology), anti-TSC2 (no. 4308, Cell Signaling Technology), anti-HA (12CA5), anti-mTOR (no. 2972, Cell Signaling Technology), anti-RAPTOR (no. 2280, Cell Signaling Technology), anti-RICTOR (A300-459A, Bethyl Laboratories), anti-DEPTOR (no.11816, Cell Signaling Technology), anti- PRAS40 (no. 2610, Cell Signaling Technology), anti-VHL (no. 2738, Cell Signaling Technology), anti-Flag (F1804, Sigma), anti-RHEB (ab25873, Abcam), anti-FKBP38

(AF3580, R&D system), anti-Flag M2 Affinity Gel (A2220, Sigma), anti-HA agarose (A2095, Sigma), anti-REDD1 (no. 10638-1-AP, Protein Tech), anti- $\beta$ -Actin (A-1978, Sigma). The dilution for all of the primary antibodies for immunoblot analysis was 1/1,000, except for  $\beta$ -Actin, which is 1/10,000. The dilution for all of the secondary antibodies for immunoblot analysis was 1/5,000.

***Generation of tetracycline-inducible HeLa and NIH/3T3 cell lines expressing wild-type or mutant mTOR***

HeLa cells were first infected with retrovirus expressing rtTA3 (pMSCV-rtTA3-PGK-hygro), followed by selection with hygromycin at 500  $\mu$ g/ml. The selected cells were subsequently infected with retrovirus expressing TRE-Flag tagged wild-type or mutant mTOR, followed by selection with puromycin at 2  $\mu$ g/ml. The tet-inducible mTOR expressing HeLa cell lines were cultured in DMEM (Invitrogen) supplemented with 10% Tet-approved FBS (Clontech), non-essential amino acids, L-glutamine, sodium pyruvate, antibiotics (Invitrogen), 50  $\mu$ g/ml hygromycin, and 0.1  $\mu$ g/ml puromycin. Optimized addition of doxycycline between 0.5-2  $\mu$ g/ml in the culture medium is required to achieve equal expression of Flag-tagged wild-type and mutant mTOR. The tet-inducible vector was constructed by the Scott Lowe Lab (Memorial Sloan-Kettering Cancer Center, New York).

NIH/3T3 cells were first infected with retrovirus expressing rtTA3 (pMSCV-rtTA3-PGK-hygro), followed by selection with hygromycin at 500  $\mu$ g/ml. The selected cells were subsequently infected with lentivirus expressing shRNA construct targeting either Vhl or luciferase, followed by selection with puromycin at 2  $\mu$ g/ml. The selected cells were subsequently infected with retrovirus expressing TRE-Flag tagged wild-type or mutant mTOR and IRES-GFP, followed by addition of doxycycline to induce expression of Flag-tagged mTOR-IRES-GFP. GFP-positive cells were sorted using MoFlo (Beckman Coulter). The sorted

NIH/3T3 cell lines expressing shRNA constructs and the tet-inducible mTOR-IRES-GFP were cultured in DMEM (Invitrogen) supplemented with 10% Tet-approved FBS (Clontech), non-essential amino acids, L-glutamine, sodium pyruvate, antibiotics (Invitrogen), 50 µg/ml hygromycin, and 0.1 µg/ml puromycin. Optimized addition of doxycycline between 0.5-2 µg/ml in the culture medium is required to achieve equal expression of Flag-tagged wild-type and mutant mTOR. To overexpress REDD1 in NIH/3T3 cells expressing shVhl and mutant mTOR constructs, the cells were infected with lentivirus expressing construct expressing either empty vector or REDD1, followed by selection with blasticidin at 2 µg/ml for 1 weeks.

### ***Co-immunoprecipitation***

8x10<sup>6</sup> 293T cells were seeded in a 10 cm dish, transfected 24 hours later with 10 µg of vectors expressing Flag-tagged wild-type or mutant mTOR as described above. 48 hours post-transfection, cells were harvested in ice-cold PBS buffer. For co-immunoprecipitation of mTOR with endogenous DEPTOR, cell pellets were lysed in buffer 1 (20 mM HEPES pH 7.4, 2 mM EDTA, and 0.3% CHAPS) containing complete protease inhibitor (Roche) and phosphatase inhibitors (EMD/Millipore). Whole cell lysates (500 µg protein) were incubated with anti-Flag M2 agarose (Sigma) overnight, then washed three times with buffer 1, and subjected to NuPAGE electrophoresis and immunoblot analysis. For co-immunoprecipitation of mTOR with other proteins, cells were lysed in buffer 2 (50mM HEPES pH7.4, 2 mM EDTA, 0.3% CHAPS, and 40 mM NaCl), whole cell lysates were incubated with anti-Flag M2 agarose for 3 hours, and then washed three times with buffer 2 containing 300 mM NaCl.

### ***In vitro kinase assays***

For immunoprecipitation of mTORC1 for in vitro kinase assays, cells were lysed in buffer 3 (40mM HEPES pH7.4, 2 mM EDTA, 0.3% CHAPS), whole cell lysates were incubated with anti-Flag M2 agarose for 3 hours, and then washed three times with buffer 3 containing 150 mM

NaCl and one time with wash buffer (50mM HEPES pH7.4, 150 mM KCl). To purify S6K for in vitro kinase assays,  $8 \times 10^6$  293T cells were seeded in a 10 cm dish for 24 hours, transfected with 10  $\mu$ g of vectors expressing HA-tagged S6K as described above. 48 hours post-transfection, cells were treated with BEZ-235 (10 $\mu$ M) for 1 hour and harvested in ice-cold PBS buffer. Cells were lysed in NP-40 buffer (150 mM NaCl, 1% NP-40, and 50mM Tris-Cl, pH8.0) containing complete protease inhibitor (Roche) and phosphatase inhibitors (EMD/Millipore). Whole cell lysates (500  $\mu$ g) were incubated with anti-HA agarose (Sigma) for 3 hours, then washed five times with NP-40 buffer, and elute with HA peptide.

Purified Flag-tagged mTORC1 complex containing wild-type or mutant mTOR was incubated with purified HA-S6K in the Kinase buffer (25mM HEPES pH7.4, 50mM KCl, 10mM MgCl<sub>2</sub>) in a final volume of 13.5  $\mu$ l on ice for 10 min, followed by the addition of 1.5  $\mu$ l of ATP (final concentration 0.5 mM) and incubation at 30°C for 30 min. The reaction was terminated by adding 2X NuPAGE LDS sample buffer (Invitrogen) and heated at 100°C for 2 min, and subjected to immunoblot analysis as described above.

### ***Targeted gene sequencing***

Paraffin-embedded patient samples including tumors (archival tissues, 260 patients) and adjacent normal kidney tissue (181 patients) from RECORD-3 trial were macro dissected and subjected to DNA extraction. A dedicated genitourinary pathologist reviewed all sections and selected areas of tumor and healthy tissue for macro dissection and DNA extraction. Somatic mutations in exons of 341 cancer related genes were identified by an NGS assay (MSK IMPACT platform) (2) at ~530X coverage. mTOR missense mutations are reported here.

### ***Molecular dynamics simulations***

The canonical wild-type mTOR sequence for the UniProt-annotated PI3K/PI4K domain span (residues 2182-2516) was modeled onto the X-ray structure of mTOR from chain A of

RCSB entry 4JSN using the Ensembler automated simulation setup tool (3) with default parameters. All residues were assigned default protonation states typical of pH 7.4. The AMBER 99SB-ILDN (4) forcefield was used for the protein along with the TIP3P solvent model (5) with neutralizing monovalent Na<sup>+</sup> or Cl<sup>-</sup> counterions. The resulting simulation box had 80,983 atoms. The OpenMM 6.2 simulation package (6) was used for all minimization, equilibration, and production simulations. Equilibration simulations utilized Langevin dynamics with a timestep of 2 fs and collision rate of 20/ps, along with a Monte Carlo barostat with molecular scaling and update interval of 50 steps, with temperature and pressure control set to 300 K and 1 atm. Particle-mesh Ewald (PME) with default parameters was used for long-range electrostatic treatment, direct-space and Lennard-Jones interactions were truncated at 9 Å, and a long-range dispersion correction was employed. Bonds to hydrogen were constrained using CCMA (7) using the default tolerance of 1e-5, and waters were rigidly constrained using SETTLE (8). The Ensembler package (9) handles energy minimization and refinement in implicit solvent followed by a short minimization and equilibration step in explicit solvent prior to production simulations.

Production simulations of the wild-type kinase domain were run on Folding@home (10) using a simulation core based on OpenMM 6.2 and the same simulation parameters, with the exception of a reduced collision rate of 1/ps. The structure obtained after 589.5 ns---which had relaxed much of the initial loop-modeling-induced structural artifacts---was used as a starting model for further modeling of mutations and subsequent production simulations.

To model mTOR mutants and wild-type kinase domain behavior, PDBFixer v1.2 (11), part of the Omnia molecular simulation suite (12), was used to generate mutant versions of the mTOR kinase domain using the relaxed wild-type structure. Subsequent simulation steps utilized reaction-field electrostatics with a cutoff of 10Å in place of PME to allow longer trajectories to be generated. Proteins were resolved in TIP3P water with NaCl counterions to



neutralize the system and produce an environment of approximately 150 mM NaCl to using a padding of 11Å around the kinase, resulting in systems of approximately 81K atoms. Langevin dynamics with a collision rate of 5/ps was used for subsequent production simulations of mutant and wild-type kinase domains, which also employed a simulation core based on OpenMM 6.2 on Folding@home. Simulation boxes were energy minimized with the OpenMM LocalEnergyMinimizer facility before subjecting them to subsequent dynamics.

Ten replicate simulations of each mutant simulation box were run on Folding@home, with each replicate receiving a unique random number seed ensuring rapid decorrelation of trajectories. Nine out of ten trajectories were 501 nanoseconds of simulation, and one trajectory was 471 nanoseconds long. The initial 100 ns of each simulation were discarded and subsequent simulation data was analyzed for structural alternations indicative of rapid mutation-induced conformational changes.

Conformational changes were detected by generating a contact map, which shows the net change in the probability of forming a contact between a pair of residues from wild-type to mutant. To calculate these probabilities, mdtraj (13) was first used to calculate the distance between every residue pair based on the closest heavy atoms in each frame of the simulations after 100 ns. Using 5 angstroms as the threshold at which a contact was formed, the number of frames in which a contact was formed was divided by the total number of frames for each simulation, giving a probability for each residue pair in that simulation which could be averaged over the number of replicates per mutant. The wild-type probability was subtracted from the mutant, giving a net change in probability to form a contact for each residue pair in the protein. The structural images were generated using PyMOL to visually inspect areas of interest identified by the contact map over the course of each simulation.

The individual net changes in average contact probabilities following 100 ns of relaxation were computed as the difference in average contact probabilities between mutant and wild-type simulations. For each kinase, the average contact probability was computed as the fraction of snapshots in which the contact was made, where all frames (after discarding the initial 100 ns/trajectory) were averaged over the ten replicate trajectories initiated from each kinase mutant or wild-type simulation box using different initial velocities and random number seeds. The net change in probabilities are reported plus or minus a standard error, which is calculated as  $\text{stddev}/\sqrt{N}$ , where  $N=10$  is the number of replicate trajectories.

## SUPPLEMENTARY REFERENCE

1. She QB, Halilovic E, Ye Q, Zhen W, Shirasawa S, Sasazuki T, Solit DB, and Rosen N. 4E-BP1 is a key effector of the oncogenic activation of the AKT and ERK signaling pathways that integrates their function in tumors. *Cancer cell*. 2010;18(1):39-51.
2. Cheng DT, Mitchell TN, Zehir A, Shah RH, Benayed R, Syed A, Chandramohan R, Liu ZY, Won HH, Scott SN, et al. Memorial Sloan Kettering-Integrated Mutation Profiling of Actionable Cancer Targets (MSK-IMPACT): A Hybridization Capture-Based Next-Generation Sequencing Clinical Assay for Solid Tumor Molecular Oncology. *The Journal of molecular diagnostics : JMD*. 2015;17(3):251-64.
3. Chodera JD. A simple method for automated equilibration detection in molecular simulations. *BioRxiv*. 2015.
4. Lindorff-Larsen K, Piana S, Palmo K, Maragakis P, Klepeis JL, Dror RO, and Shaw DE. Improved side-chain torsion potentials for the Amber ff99SB protein force field. *Proteins*. 2010;78(8):1950-8.
5. Jorgensen WL, Chandrasekhar J, Madura JD, Impey RW, and Klein ML. Comparison of simple potential functions for simulating liquid water. *J Chem Phys* 1983;79(
6. Eastman P, Friedrichs MS, Chodera JD, Radmer RJ, Bruns CM, Ku JP, Beauchamp KA, Lane TJ, Wang LP, Shukla D, et al. OpenMM 4: A Reusable, Extensible, Hardware Independent Library for High Performance Molecular Simulation. *Journal of chemical theory and computation*. 2013;9(1):461-9.
7. Eastman P, and Pande VS. CCMA: A Robust, Parallelizable Constraint Method for Molecular Simulations. *Journal of chemical theory and computation*. 2010;6(2):434-7.
8. Miyamoto S, and Kollman PA. Settle: An analytical version of the SHAKE and RATTLE algorithm for rigid water models. *Journal of computational chemistry*. 1992;13(8):952-62.
9. Parton DL, Chodera JD, and Grinaway PB. <https://github.com/choderalab/ensemble>.
10. Shirts M, and Pande VS. COMPUTING: Screen Savers of the World Unite! *Science*. 2000;290(5498):1903-4.
11. Li Y, Wang R, Ma E, Deng Y, Wang X, Xiao J, and Jing Y. The induction of G2/M cell-cycle arrest and apoptosis by cucurbitacin E is associated with increased phosphorylation of eIF2alpha in leukemia cells. *Anti-cancer drugs*. 2010;21(4):389-400.

12. Misra UK, and Pizzo SV. Modulation of the unfolded protein response in prostate cancer cells by antibody-directed against the carboxyl-terminal domain of GRP78. *Apoptosis : an international journal on programmed cell death*. 2010;15(2):173-82.
13. McGibbon RT, Beauchamp KA, Harrigan MP, Klein C, Swails JM, Hernandez CX, Schwantes CR, Wang LP, Lane TJ, and Pande VS. MDTraj: A Modern Open Library for the Analysis of Molecular Dynamics Trajectories. *Biophysical journal*. 2015;109(8):1528-32.
